1 **m<sup>6</sup>A demethylase ALKBH5 promotes tumor cell proliferation by destabilizing**  
2 **IGF2BPs target genes and worsens the prognosis of patients with non-small-cell**  
3 **lung cancer**

4

5 Kazuo Tsuchiya<sup>1,2</sup>, Katsuhiko Yoshimura<sup>1,2</sup>, Yuji Iwashita<sup>1</sup>, Yusuke Inoue<sup>1,2</sup>, Tsutomu  
6 Ohta<sup>1,3</sup>, Hirofumi Watanabe<sup>1,2</sup>, Hidetaka Yamada<sup>1</sup>, Akikazu Kawase<sup>4</sup>, Masayuki  
7 Tanahashi<sup>5</sup>, Hiroshi Ogawa<sup>6</sup>, Kazuhito Funai<sup>4</sup>, Kazuya Shinmura<sup>1</sup>, Takafumi Suda<sup>2</sup>,  
8 Haruhiko Sugimura<sup>1\*</sup>.

9

10 1. Department of Tumor Pathology, Hamamatsu University School of Medicine,

11 Hamamatsu, Japan

12

2. Second Division, Department of Internal Medicine, Hamamatsu University

13

School of Medicine, Hamamatsu, Japan

14

3. Department of Physical Therapy, Faculty of Health and Medical Sciences, Tokoha

15

University, Hamamatsu, Japan

16

4. First Department of Surgery, Hamamatsu University School of Medicine, Hamamatsu,

17

Japan

18

5. Division of Thoracic Surgery, Respiratory Disease Center, Seirei Mikatahara

19

General Hospital, Hamamatsu, Japan

20

6. Department of Pathology, Seirei Mikatahara General Hospital, Hamamatsu, Japan

21

22

23

24 **Corresponding author:**

25

Haruhiko Sugimura, MD, Ph.D., Department of Tumor Pathology, Hamamatsu

26

University School of Medicine, 1-20-1 Handayama Higashi-ku, Hamamatsu, Shizuoka

27

431-3192 Japan. Tel: +81-53-435-2220; Fax: +81-53-435-2225; Email:

28

[hsugimur@hama-med.ac.jp](mailto:hsugimur@hama-med.ac.jp)

29

30 **Abstract**

31

The modification of *N*<sup>6</sup>-methyladenosine (m<sup>6</sup>A) in RNA and its eraser ALKBH5, an

32

m<sup>6</sup>A demethylase, play an important role across various steps of human carcinogenesis.

33

However, the involvement of ALKBH5 in non-small-cell lung cancer (NSCLC)

34

development remains to be completely elucidated. The current study revealed that the

35

expression of ALKBH5 was increased in NSCLC and increased expression of ALKBH5

36 worsened the prognosis of patients with NSCLC. *In vitro* study revealed that ALKBH5  
37 knockdown suppressed cell proliferation ability of PC9 and A549 cells and promoted  
38 G1 arrest and increased the number of apoptotic cells. Furthermore, ALKBH5  
39 overexpression increased the cell proliferation ability of the immortalized cell lines.  
40 Microarray analysis and western blotting revealed that the expression of CDKN1A  
41 (p21) or TIMP3 was increased by ALKBH5 knockdown. These alterations were offset  
42 by a double knockdown of both ALKBH5 and one of the IGF2BPs. The decline of  
43 mRNAs was, at least partly, owing to the destabilization of these mRNAs by one of the  
44 IGF2BPs. In conclusions, the ALKBH5–IGF2BPs axis promotes cell proliferation and  
45 tumorigenicity, which in turn causes the unfavorable prognosis of NSCLC.

46

47 **Keywords:** Non-small-cell lung cancer (NSCLC), m<sup>6</sup>A, ALKBH5, IGF2BPs, CDKN1A  
48 (p21), TIMP3

49

## 50 **Background**

51 Lung cancer, the incidence of which has continued to increase annually,  
52 remains the most frequently diagnosed cancer and leading cause of cancer-related death  
53 worldwide (1). Considering the rapid improvement in the treatment of lung cancer,

54 particularly non-small-cell lung cancer (NSCLC), physicians now have several options  
55 of personalized treatments targeting driver genes, such as EGFR mutations, ALK  
56 rearrangements, ROS1 rearrangements, and BRAF mutations or combination therapies  
57 comprising immunotherapy and anticancer drugs (2-6). However, despite the current  
58 advancements in precision medicine, NSCLC still exhibits poor long-term prognosis  
59 and high mortality rates owing to the rapid growth, metastasis, and infiltration of cancer.  
60 Therefore, identifying effective therapeutic targets that inhibit such malignant behaviors  
61 of NSCLC is urgently needed.

62 *N*<sup>6</sup>-methyladenosine (m<sup>6</sup>A), the most prevalent internal messenger RNA (mRNA)  
63 modification, controls various mRNA functions. The m<sup>6</sup>A sites, which are widely  
64 distributed around the stop codons and 3' untranslated regions (UTRs) of mRNAs,  
65 presumably exist in precursor mRNAs (7). Recent m<sup>6</sup>A transcriptome analysis revealed  
66 that m<sup>6</sup>A is predominantly present in the RRACU (R = A/G) consensus motif of  
67 mammals (8). m<sup>6</sup>A is reversibly catalyzed by a methyltransferase complex (writer) and  
68 demethylase (eraser). Accordingly, the methyltransferase complex comprises  
69 methyltransferase-like 3 and 14 (METTL3 and METTL14) with their cofactors Wilms  
70 tumor 1-associated protein (WTAP), VIRMA (KIAA1429), and RNA-binding motif  
71 protein 15 (RBM15) (9-12). Further, fat mass and obesity-related protein (FTO) and

72 AlkB homolog 5 (ALKBH5) have been identified as two eukaryotic demethylases that  
73 oxidatively demethylate m<sup>6</sup>A with  $\alpha$ -ketoglutarate as a substrate and Fe (II) as a  
74 coenzyme (13, 14). FTO is also involved in the demethylation of  
75 N<sup>6</sup>,2'-O-dimethyladenosine (m<sup>6</sup>A<sub>m</sub>) whereas there is no other RNA than m<sup>6</sup>A that is  
76 demethylated by ALKBH5 (15, 16). Moreover, m<sup>6</sup>A-binding protein (reader protein),  
77 which recognizes m<sup>6</sup>A, is involved in numerous biological processes in an  
78 m<sup>6</sup>A-dependent manner. For instance, YT521-B homology (YTH) domain containing 1  
79 (YTHDC1) and YTHDC2 promote alternative splicing and mRNA export from the  
80 nucleus to the cytoplasm (17, 18); heterogeneous nuclear ribonucleoprotein G  
81 (HNRNPG) alters RNA structures via RNA–protein interaction (19, 20); YTH domain  
82 family1 (YTHDF1), YTHDF3, METTL3, and eukaryotic initiation factor3 (eIF3)  
83 regulate translation efficiency (21-24); and insulin-like growth factor 2 mRNA-binding  
84 proteins (IGF2BPs), YTHDF2, YTHDF3, and YTHDC2 alter mRNA stability (24-27).

85 Over the past few years, several researchers investigating the role of m<sup>6</sup>A  
86 erasers in malignant tumors have revealed that m<sup>6</sup>A eraser proteins play a critical role in  
87 oncogenesis. A number of previous studies have demonstrated that ALKBH5 exerts a  
88 cancer-promoting effect in glioblastoma, osteosarcoma, colon cancer, ovarian cancer,  
89 esophageal squamous cell carcinoma, endometrial cancer, and renal cell carcinoma

90 (28-34). In contrast, ALKBH5 has been reported to play a tumor-suppressing effect in  
91 hepatocellular carcinoma and pancreatic cancer (35, 36). Several studies on lung cancer  
92 have shown that FTO plays a cancer-promoting role through m<sup>6</sup>A modification in lung  
93 squamous cell carcinoma and adenocarcinoma (37-39), whereas ALKBH5 inhibits  
94 NSCLC tumorigenesis by reducing YTHDFs-mediated YAP expression (40).  
95 Conversely, ALKBH5 had also been found to promote NSCLC progression by reducing  
96 TIMP3 stability (41) or stabilizing oncogenic drivers such as SOX2, SMAD7, and  
97 MYC (42). Thus, the precise role of ALKBH5 in NSCLC tumorigenesis across various  
98 conditions deserves further investigation.

99           Cell type and cell environment (e.g., during hypoxic conditions), as well as the  
100 m<sup>6</sup>A target gene and its recognition protein (reader), have been found to affect RNA  
101 metabolism caused by ALKBH5 perturbation (43, 44). Therefore, m<sup>6</sup>A-mediated gene  
102 expression regulated by ALKBH5 could result in various consequences in cancer cells,  
103 depending on the surrounding environment and other factors. Several studies regarding  
104 m<sup>6</sup>A have focused on specific genes in the specific contexts, with their results showing  
105 that m<sup>6</sup>A is involved in the mechanisms through which these specific genes are  
106 regulated. However, in actual human cancers, ALKBH5 catalyzes specific m<sup>6</sup>A of  
107 numerous genes, which simultaneously alters several RNA and protein expressions

108 through RNA recognition by reader proteins, consequently causing numerous  
109 interactions between them *in vivo*. As such, systematically clarifying the association  
110 between m<sup>6</sup>A modification and cancer development across each clinical and  
111 pathological setting is important. Furthermore, elucidating the significance of m<sup>6</sup>A  
112 modification by ALKBH5 may facilitate the clinical usage of such molecules as  
113 therapeutic targets. Therefore, the current study aimed to examine the role of m<sup>6</sup>A  
114 demethylase in NSCLC focusing on ALKBH5 and determine its association with  
115 downstream targets, including “readers” and “target genes.”

116

## 117 **Methods**

### 118 **Immunohistochemistry**

119 Resected NSCLC samples from Hamamatsu University School of Medicine and Seirei  
120 Mikatahara General Hospital were collected and named as the HUSM cohort. Tissue  
121 microarray (TMA) sections were analyzed using immunohistochemistry (IHC) as  
122 previously described (45). Cores of insufficient quality or quantity were excluded from  
123 the analysis. Antibodies for ALKBH5 (HPA007196, Atlas Antibodies, Stockholm,  
124 Sweden) and FTO (Ab124892, Abcam, Cambridge, UK) were diluted at 1:400, whereas  
125 those specific for EGFR E746-A750 deletion (#2085, D6B6, Cell Signaling Technology

126 [CST], Danvers, MA, USA) and EGFR L858R mutant (#3197, 43B2, CST) were  
127 diluted at 1:100, followed by incubation at room temperature for 0.5 h. Protein  
128 expression levels were then assessed using the H-score, which was calculated by  
129 multiplying the percentage of stained tumor area (0%–100%) by the staining intensity  
130 (scored on a scale of 0–3) to yield a value ranging from 0 to 300.

131

### 132 **Analysis of publicly available datasets**

133 We used the lung cancer database in the Kaplan–Meier plotter  
134 ([http://kmplot.com/analysis/index.php? p=service&cancer=lung](http://kmplot.com/analysis/index.php?p=service&cancer=lung)) to analyze the  
135 association between prognosis and ALKBH5 and FTO mRNA expression in NSCLC  
136 cohorts. Data were downloaded on December 10, 2020. Kaplan–Meier curves for  
137 overall survival (OS) were generated and stratified according to the median expression  
138 of each mRNA. To assess the mRNA expression of ALKBH5 and FTO, data from the  
139 Cancer Genome Atlas (TCGA) (NSCLC, Provisional) were downloaded from  
140 cBioPortal (<http://www.cbioportal.org/>) on November 11, 2019. Expression data were  
141 obtained in the form of RNA-seq by Expectation Maximization (RSEM).

142

### 143 **Immunofluorescence analysis**



144 Cells grown on coverslips were fixed with 4% paraformaldehyde and permeabilized  
145 with 0.1% Triton X-100. After blocking with 5% bovine serum albumin in PBS (–) at  
146 room temperature for 1 h, the cells were probed with primary antibodies against  
147 ALKBH5 (HPA007196, Atlas Antibodies) and then incubated with a Goat anti-Rabbit  
148 IgG (H + L) Cross-Adsorbed Secondary Antibody, Alexa Fluor 546 (#A-11010, Thermo  
149 Fisher Scientific, Waltham, MA, USA). Nuclei were stained with ProLong® Gold  
150 Antifade Reagent with DAPI (#8961, CST), after which the cells were imaged via  
151 fluorescence microscopy using z-stack image reconstructions (BZ-9000; Keyence,  
152 Osaka, Japan).

153

#### 154 **Cell lines and transient knockdown with siRNA**

155 The human lung cancer cell lines H1299, H460, H2087, A549, ABC1, and H358 and  
156 the human immortalized cell lines BEAS2B and HEK293 were obtained from Health  
157 Science Research Resources Bank (Osaka, Japan) or the American Type Culture  
158 Collection (Manassas, VA, USA). PC3 and PC9 lung cancer cells were purchased from  
159 the Japanese Collection of Research Bioresources Cell Bank (Osaka, Japan) and  
160 RIKEN BioResource Center (Tsukuba, Japan), respectively, whereas ACC-LC176 cells  
161 were a kind gift from Dr. Takashi Takahashi (Nagoya University). RERF-LC-MS,

162 HLC-1, and LC-2/ad were kind gifts from Dr. Toshiro Niki (Tokyo University). Lung  
163 cancer cell lines were cultured in RPMI1640 medium (R8758, Thermo Fisher  
164 Scientific), whereas HEK293 cells were cultured in DMEM (D5796 MERCK,  
165 Darmstadt, Germany) containing 10% (vol./vol.) fetal bovine serum (FBS), 100 IU/mL  
166 penicillin G, and 100 µg/mL streptomycin. LHC9 (12680013, Thermo Fisher  
167 Scientific) was also used as a medium for BEAS2B cells. Cells were maintained in a  
168 5% CO<sub>2</sub> and 95% air incubator at 37°C. Silencer Select Pre-designed siRNA for  
169 ALKBH5 (siALKBH5: s29743, s29744, s29745, Thermo Fisher Scientific), FTO  
170 (siFTO: s28147, s28148, s28149, Thermo Fisher Scientific), IGF2BP1 (siIGF2BP1:  
171 s20916, s20917, Thermo Fisher Scientific), IGF2BP2 (siIGF2BP2: s20922, s20923,  
172 Thermo Fisher Scientific), IGF2BP3 (siIGF2BP3: s20919, s20920, Thermo Fisher  
173 Scientific), YTHDF2 (siYTHDF2: s28147, s28148, Thermo Fisher Scientific),  
174 CDKN1A (siCDKN1A: s145, s147, Thermo Fisher Scientific), TIMP3 (siTIMP3:  
175 s14147, s14148, Thermo Fisher Scientific), and Silencer Select Negative control (siNC:  
176 4390843, Thermo Fisher Scientific) were purchased for transient knockdown. More  
177 than two different sequences were used for one target gene to minimize off-target  
178 effects. Cells were cultured for 24 h before transfection, after which they were  
179 transfected with 15 nM of final siRNA concentrations using Opti-MEM (31985070,

180 Gibco, Dublin, Ireland) and Lipofectamine® 2000 (11668019, ThermoFisher). The cells  
181 were then used for further assays at 48–96 h after transfection. When no siRNA sample  
182 number was available, siRNA no. 1 (#1) and siRNA no. 3 (#3) were pooled for  
183 ALKBH5 unless otherwise specified. siIGF2BP1, siIGF2BP2, siIGF2BP3, siYTHDF2,  
184 siCDKN1A, and siTIMP3 were pooled for all transfections.

185

#### 186 **Generation of Retro-X Tet-On inducible cell lines overexpressing ALKBH5**

187 The retroviral plasmid pRetroX-TetOne puro (634307, Clontech, Mountain View, CA,  
188 USA) was amplified using NEB Stable competent *Escherichia coli* (high efficiency)  
189 (C3040H, NEW ENGLAND BioLabs, Ipswich, MA, USA). The full-length ALKBH5  
190 sequence (NM\_017758), which was confirmed using Sanger sequencing, was subcloned  
191 into pRetroX-TetOne puro vector using EcoRI and BglIII restriction sites  
192 (pRetroX-TetOne puro-ALKBH5). Retroviral supernatants were produced using the  
193 GP2-293 packaging cell line (Clontech), in which pRetroX-TetOne puro empty vector  
194 or pRetroX-TetOne puro-ALKBH5 were each cotransfected with the envelope vector  
195 VSV-G using Xfect transfection reagent (Clontech). BEAS2B, HEK293, PC9, and A549  
196 cells were transfected for 24 h using 4 µg/mL polybrene (H9268, Sigma-Aldrich, St.  
197 Louis, MO, USA). Puromycin selection (0.5–1.5 µg/mL) began 48 h after transfection

198 and lasted for 3 days until all nontransfected cells had died. In subsequent experiments,  
199 Retro-X cells were induced with 0.1–100 ng/mL of doxycycline (DOX) diluted in  
200 culture media upon cell seeding for 24–96 h. Cells transfected with pRetroX-TetOne  
201 puro-ALKBH5 with 100 ng/mL DOX were designated as ALKBH5-overexpressed  
202 (OE) cells, whereas those infected without DOX were designated as negative control  
203 (NC) unless otherwise noted.

204

#### 205 **RNA isolation and quantitative-polymerase chain reaction (qPCR)**

206 Total RNA was extracted using the RNeasy Plus Mini Kit (#74136, QIAGEN, Hilden,  
207 Germany) according to the manufacturer's instructions, with the total RNA  
208 concentration calculated using Nanodrop (NanoDrop1000, Thermo Fisher Scientific).  
209 cDNA was synthesized from 1 µg of total RNA using the ReverTra Ace qPCR RT  
210 Master Mix (FSQ-201, TOYOBO) or SuperScript III Reverse Transcriptase (1080044,  
211 Thermo Fisher Scientific) according to the manufacturer's instructions. qPCR reactions  
212 were performed on a Step One Plus Real-Time PCR System (Applied Biosystems,  
213 Thermo Fisher Scientific) using the THUNDERBIRD qPCR Mix (QPS-201, TOYOBO,  
214 Osaka, Japan). The relative RNA expression levels were calculated using the  $\Delta\Delta C_t$   
215 method, with the levels normalized to glyceraldehyde 3-phosphate dehydrogenase

216 (GAPDH) mRNA. All amplicons were confirmed as a single product using agarose gel  
217 visualization and/or melting curve analysis. The applied primer sequences are listed in  
218 Table S1.

219

## 220 **Protein isolation and western blotting**

221 Total protein lysates were extracted from whole cells using 1× sodium dodecyl sulfate  
222 (SDS) sample buffer. The Pierce BCA Protein Assay Kit (Cat#23225, Thermo Fisher  
223 Scientific) was used to determine the protein concentration. All proteins were separated  
224 using SDS-polyacrylamide gel electrophoresis and transferred to PVDF Blotting  
225 Membrane (P 0.45, A29532146, GE healthcare Life science, Chicago, IL, USA) using  
226 the Trans-Blot Turbo Cassette (Bio-Rad, Hercules, CA, USA). Blocking One (03953,  
227 Nacalai, Kyoto, Japan) or 5% skimmed milk were used for blocking. Primary antibodies  
228 for ALKBH5 (1:1000 dilution, HPA007196; Atlas Antibodies), FTO (1:1000 dilution,  
229 Ab124892; Abcam), IGF2BP1 (1:1000 dilution, 22803-1-AP; Proteintech), IGF2BP2  
230 (1:1000 dilution, 11601-1-AP; Proteintech), IGF2BP3 (1:2000 dilution, 14642-1-AP;  
231 Proteintech), YTHDF2 (1:400, Ab170118, Abcam), TIMP3 (1:3000 dilution, Ab39184;  
232 Abcam), p21 (1:1000 dilution, A1483; ABclonal, Woburn, MA, USA), E2F1 (1:500  
233 dilution, A2067; ABclonal), CCNG2 (0.2µg/mL, Ab251826; Abcam), p53 (1:200

234 dilution, Sc-126; SANTA CRUZ BIO TECHNOLOGY, Dallas, TX, USA), and GAPDH  
235 (1:1000 dilution, Ab8245; Abcam) were incubated for overnight at 4°C. Secondary  
236 antibodies for rabbit (1:20000 dilution, NA9340; GE healthcare Life science) or mouse  
237 (1:20000 dilution, NA9310; GE Healthcare Life Science) were incubated at room  
238 temperature with 1%–5% skimmed milk for 1 h. Enhanced chemiluminescence (Pierce  
239 ECL Plus Substrate or West Atto Ultimate Sensitivity Substrate, Thermo Fisher  
240 Scientific) was used to visualize the protein bands using ChemiDoc Touch (Bio-Rad).

241

#### 242 **Cell viability assay**

243 Cells were seeded into 96-well plates with 3000 cells per well after 48 h of knockdown  
244 or overexpression. Cell proliferation was monitored using Cell Counting Kit-8 (CCK-8;  
245 Dojindo, Kumamoto, Japan) according to the manufacturer's protocol. Thereafter, the  
246 cells were incubated with 10% CCK-8 for 1 h, followed by absorbance assessment at  
247 450 nm in each well via spectrophotometry (Synergy HT, BioTek, Winooski, VT, USA)  
248 every 24 h.

249

#### 250 **Transwell migration assay**

251 Cell migration was evaluated using a 24-well plate with cell culture inserts (353097,  
252 Falcon, Mexico City, Mexico) containing a filter with 8  $\mu\text{m}$ -diameter pores. Briefly,  
253 after serum starvation for 24 h with 0.1% FBS-containing RPMI1640 medium,  $1 \times$   
254  $10^5$  cells resuspended in 500  $\mu\text{L}$  of RPMI1640 medium (Gibco) were seeded into the  
255 upper chamber, after which RPMI1640 medium containing 10% FBS was placed in the  
256 lower compartment of the chamber. After incubation for 16 h, the upper surface of the  
257 membrane was wiped with a cotton-tipped applicator to remove nonmigrating cells,  
258 whereas the migrating cells on the lower surface were fixed with cold methanol and  
259 stained with 0.5% crystal violet. Migrating cells were automatically counted in three  
260 random microscopic fields using the Hybrid Cell Count software  
261 (BZ- $\square$  Analyzer, Keyence, Osaka, Japan).

262

### 263 **Wound-healing assays**

264 To assess cell migration,  $2 \times 10^5$  cells were seeded into 6-well plates. Thereafter, cells  
265 were incubated in 5%  $\text{CO}_2$  at 37 $\square$  for 48 $\square$ h and an additional 24 h with 0.1%  
266 FBS-containing RPMI1640 medium. A wound was scratched into the cells using a  
267 200- $\mu\text{L}$  plastic tip and washed with PBS (-). The cells were then incubated in  
268 RPMI1640 containing 10% FBS. The relative distance of the scratches was observed

269 under an optical microscope (IX53, Olympus, Tokyo, Japan) at 3–6 time points after  
270 wounding and assessed using the Image J software.

271

## 272 **Cell cycle assay and apoptosis assay**

273 Cell Cycle Assay Solution Blue (C549, Dojindo) was used to measure the cell cycle  
274 according to the manufacturer's instructions. Briefly, treated cells were synchronized at  
275 the G1 phase through serum starvation with 0.1% FBS-containing medium for 48 h. At  
276 24 h after the release of serum starvation, the treated cells were collected, washed with  
277 PBS (–), and incubated with 5  $\mu$ L cell cycle assay solution for 15 min at 37°C.

278 Thereafter, DNA content was determined based on staining intensity using a Gallios  
279 flow cytometer (Beckman Coulter, Miami, FL, USA). The annexin V-FITC Apoptosis  
280 Detection Kit (15342-54 Nacalai) was used to detect apoptosis by measuring annexin V  
281 and propidium iodide (PI)-positive cells following the manufacturer's instructions.

282 Briefly, cells were incubated for 96 h after siRNA transfection. To induce apoptosis, the  
283 cells were exposed to either 7.5  $\mu$ M of gefitinib (078-06561, FUJIFILM) or 10  $\mu$ M of  
284 cisplatin (P4394, Sigma-Aldrich) alone for 48 h after siRNA transfection. The treated  
285 cells were collected, washed with PBS (–), and incubated with 5  $\mu$ L of annexin V-FITC  
286 solution and 5  $\mu$ L of PI solution for 15 min. Thereafter, apoptotic cells were determined



287 using a Gallios flow cytometer. Results were analyzed using the FlowJo software  
288 (Becton, Dickinson, Franklin Lakes, NJ, USA), after which the extent of apoptosis and  
289 cell cycle distribution were determined.

290

### 291 **RNA stability assay**

292 Cancer cells were incubated for 48 h after siRNA transfection. Cells were treated with  
293 actinomycin D at a final concentration of 5 µg/mL. Total RNA was extracted at 0, 2, 4,  
294 and 6 h after adding actinomycin D. The remaining CDKN1A and TIMP3 mRNA was  
295 measured through quantitative real-time PCR and normalized to RPL32 mRNA, which  
296 has a half-life of 25 h.

297

### 298 **Quantitative analysis of global m<sup>6</sup>A levels using liquid chromatography–mass 299 spectrometry/mass spectrometry (LC–MS/MS)**

300 PolyA-enriched RNA was extracted using PolyAtract mRNA isolation systems  
301 (#Z5310 Promega, Madison, WI, USA) according to the manufacturer's instructions.  
302 PolyA-enriched RNA concentration was calculated using Qubit 2.0. The  
303 polyA-enriched RNA was enzymatically hydrolyzed using 8-OHdG Assay Preparation  
304 Reagent Set (292-67801, FUJIFILM Wako Pure Chemical Corporation, Tokyo, Japan).

305 Technically, 100 ng of polyA-enriched RNA was digested using 5.7  $\mu$ L of acetic acid  
306 buffer and 3  $\mu$ L of Nuclease P1 included in the 45- $\mu$ L sample containing nuclease-free  
307 water at 37 $^{\circ}$ C for 30 min, followed by incubation with 6  $\mu$ L of Tris Buffer and 0.3  $\mu$ L of  
308 alkaline phosphatase at 37 $^{\circ}$ C for 30 min. After digestion, the sample was centrifuged at  
309 14,000 *g* and 4 $^{\circ}$ C for 20 min using a Nanosep 3K Omega centrifugal device (Pall  
310 Corporation, Port Washington, NY, USA) according to a previously published method  
311 (46).

312 As an internal standard, *N*<sup>6</sup>-methyladenosine-d3 (*m*<sup>6</sup>A-d3; M275897, Toronto Research  
313 Chemicals, Toronto, Canada), which is a stable isotope of *N*<sup>6</sup>-methyladenosine labeled  
314 with three deuterium atoms on the *N*<sup>6</sup>-methyl group, was added to the nucleosides  
315 obtained via digestion of polyA-enriched RNA. These nucleosides were separated using  
316 an Acquity UPLC HSS T3 column (2.1 mm  $\times$  100 mm; Waters, Milford, CT, USA) with  
317 0.1% (vol./vol.) formic acid in water as mobile phase A and methanol as mobile phase B  
318 at a flow rate of 200  $\mu$ L/min in a linear gradient elution of 5%–60% B from 0 to 7 min.  
319 Standard compounds of adenosine (A; A9251, Sigma-Aldrich), *N*<sup>6</sup>-methyladenosine  
320 (*m*<sup>6</sup>A; A170736, Sigma-Aldrich), and *m*<sup>6</sup>A-d3 were used to confirm the  
321 nucleoside-to-base ion mass transitions of 268.1–136.4 (A), 282.2–150.2 (*m*<sup>6</sup>A), and  
322 285.2–153.2 (*m*<sup>6</sup>A-d3). Peak areas of A, *m*<sup>6</sup>A, and *m*<sup>6</sup>A-d3 in the nucleosides digested

323 from polyA-enriched RNA were calculated using the column retention time of the  
324 standard compounds using Analyst 1.6.1 software (AB SCIEX, Foster City, CA, USA).  
325 The m<sup>6</sup>A level was quantified as the ratio of m<sup>6</sup>A to A or m<sup>6</sup>A-d3 based on the  
326 calibrated concentrations.

327

### 328 **Microarray analysis of differentially expressed genes**

329 Total RNA was extracted from ALKBH5-knockdown or control PC9 cells 96 h after  
330 transfection. RNA samples were used for global gene expression profiling on human  
331 Clariom S Assay microarrays (Thermo Fisher Scientific, Wilmington, DE, USA), which  
332 include 24351 genes. All microarray analyses were entrusted to Filgen Inc. (Aichi,  
333 Japan). A total RNA quality control check was performed using a NanoDrop ND-1000  
334 (Thermo Scientific) and an Agilent 2100 Bioanalyzer. Using the Gene Chip TM WT  
335 PLUS Reagent Kit, fragmented and labeled cDNA samples were prepared from 250 ng  
336 of total RNA according to the manufacturer's instructions (Gene Chip TM WT PLUS  
337 Reagent Kit User Manual). Thereafter, 100 µL of hybridization solution was prepared  
338 using 73 µL of Hybridization Master Mix and 2.3 µg of fragmented and labeled cDNA.  
339 The array was incubated using the Gene Chip TM Hybridization Oven 645 at 45°C for  
340 16 h (60 rpm). The array was cleaned using the Gene Chip TM Fluidics Station 450 and

341 scanned using the Gene Chip™ Scanner 3000 7G according to the manufacturer's  
342 instructions [Gene Chip™ Command Console (AGCC) 4.0 User Manual]. The  
343 Microarray Data Analysis Tool version 3.2 (Filgen, Aichi, Japan) was used for data  
344 normalization and subsequent processing. Differentially expressed mRNAs were  
345 identified using a set cutoff (fold change > 1.5 or < 0.67;  $P < 0.01$ ). Gene set  
346 enrichment analysis (GSEA) was performed to examine the gene sets regulated by  
347 ALKBH5 knockdown (<http://software.broadinstitute.org/gsea/omdex.jsp>). For analysis,  
348 the false discovery rate (FDR) based on gene set permutation was used. Microarray data  
349 has been deposited in the Gene Expression Omnibus (GEO) at the National Center for  
350 Biotechnology Information (NCBI) (accession number GSE165453).

351

### 352 **Epitranscriptomic microarray analysis**

353 Unfragmented total RNA was extracted from ALKBH5-knockdown or control PC9 cells  
354 at 96 h after transfection and quantified using the NanoDrop ND-1000. RNA samples  
355 were used for global m<sup>6</sup>A expression profiling on an Arraystar Human mRNA&IncRNA  
356 Epitranscriptomic Microarray (8 × 60 K; Arraystar), which includes 44,122  
357 protein-coding mRNAs and 12,496 long noncoding RNAs. Microarray analyses were  
358 entrusted to Arraystar Inc. (Rockville, MD, USA). Sample preparation and microarray

359 hybridization were performed based on Arraystar's standard protocols. Briefly, total  
360 RNAs were immunoprecipitated with an anti-m<sup>6</sup>A antibody (Synaptic Systems, 202003).  
361 The "immunoprecipitated (IP)" and "supernatant (Sup)" RNAs were labeled with Cy5  
362 and Cy3, respectively, as cRNAs in separate reactions using the Arraystar Super RNA  
363 Labeling Kit. The cRNAs were combined and hybridized onto Arraystar Human  
364 mRNA&lncRNA Epitranscriptomic Microarray (8 × 60 K, Arraystar). After washing the  
365 slides, the arrays were scanned in two-color channels using an Agilent Scanner G2505C.  
366 Agilent Feature Extraction software (version 11.0.1.1) was used to analyze acquired  
367 array images. Raw intensities of IP (Cy5-labeled) and Sup (Cy3-labeled) were  
368 normalized with an average of log<sub>2</sub>-scaled Spike-in RNA intensities. The "m<sup>6</sup>A  
369 methylation level" was calculated to determine the percentage of modification based on  
370 the IP (Cy5-labeled) and Sup (Cy3-labeled) normalized intensities. "m<sup>6</sup>A quantity" was  
371 calculated to determine the amount of m<sup>6</sup>A methylation based on the IP (Cy5-labeled)  
372 normalized intensities. Differentially m<sup>6</sup>A-methylated RNAs between both comparison  
373 groups were identified by filtering with a fold change of >1.5 or <0.67 ( $P < 0.01$ )  
374 through the unpaired *t*-test. Microarray data had been deposited in the GEO at the NCBI  
375 (accession number GSE165454).  
376

377 **qPCR for methylated RNA immunoprecipitation (MeRIP) with m<sup>6</sup>A antibody**  
378 ALKBH5-knockdown or control lung cancer cells were used for methylated RNA  
379 immunoprecipitation assay. The Magna MeRIP m<sup>6</sup>A kit (catalog no.17-10499, Millipore,  
380 Burlington, MA, USA) was used according to the manufacturer's protocol. Briefly, the  
381 polyA-enriched RNA was fragmented into 100–200 nucleotides incubated with RNA  
382 fragmentation buffer for 55 s (CS220011, Millipore). The size of polyA-enriched RNA  
383 fragments was optimized using the Agilent 4200 TapeStation (Agilent technologies,  
384 Santa Clara, CA, USA). We used 0.5 µg of fragmented polyA-enriched RNA as input  
385 control and 5 µg of fragmented polyA-enriched RNA for m<sup>6</sup>A mRNA  
386 immunoprecipitation, followed by incubation with m<sup>6</sup>A antibody (MABE1006,  
387 Millipore)- or mouse IgG-conjugated Protein A/G Magnetic Beads in 500 µL 1× IP  
388 buffer supplemented with RNase inhibitors at 4°C overnight. Methylated RNAs were  
389 immunoprecipitated with beads, eluted via competition with free m<sup>6</sup>A, and purified  
390 using the RNeasy kit (Qiagen). Moreover, modification of m<sup>6</sup>A toward particular genes  
391 was determined using qPCR analysis with specific primers [primers for the positive  
392 control region (stop codon, EEF1A1+) or NC region (exon 5, EEF1A1–) of human  
393 EEF1A1 was included in the Magna MeRIP m<sup>6</sup>A kit]. To design primers for MeRIP  
394 qPCR, m<sup>6</sup>A sites of specific genes were predicted using the sequence-based RNA

395 adenosine methylation site predictor algorithm (<http://www.cuilab.cn/sramp>) (47). We  
396 focused on the potential m<sup>6</sup>A sites in the 3' UTRs near the stop codon and designed  
397 primers to ensure that the target sequences were present in these sites with a limited  
398 length of 120 nt. Self-designed primers for MeRIP qPCR are listed in Table S1.

399

#### 400 **Statistical analysis**

401 Discrete variables were expressed as numbers (percentages), whereas continuous  
402 variables were expressed as means  $\pm$  standard deviations (SDs) unless otherwise  
403 specified. The Mann–Whitney *U* test was used to compare continuous individual  
404 samples, whereas Student's *t*-test was applied to compare continuous experimental data.  
405 Fisher's exact test for independence was used to compare categorical data between  
406 groups. The Wilcoxon matched-pairs signed-rank test was used to compare two  
407 corresponding groups. Spearman's correlation coefficient was used for correlation  
408 analysis. Kaplan–Meier curves with log-rank tests were used to analyze survival.  
409 Accordingly, OS was defined as the duration from baseline to the date of death, whereas  
410 recurrence-free survival (RFS) was defined as the duration from baseline to the  
411 recurrence date. Univariate and multivariate Cox proportional hazards models were  
412 applied to generate hazard ratios (HRs) for death while adjusting for other potential

413 confounding factors. Cell proliferation and RNA stability assays were analyzed using  
414 two-way analysis of variance. Statistical analyses were performed using GraphPad  
415 Prism Version 8 (GraphPad Software, San Diego, CA, USA) and EZR software  
416 (Saitama Medical Center, Jichi Medical University, Saitama, Japan), with *P* values of  
417 <0.05 indicating statistical significance.

418

## 419 **Results**

### 420 **High ALKBH5 expression was associated with a worse prognosis in patients with** 421 **NSCLC**

422 To investigate the impact of ALKBH5 and FTO in NSCLC, we examined the mRNA  
423 expression levels of ALKBH5 and FTO in non-cancerous lung tissues and NSCLC  
424 tissues using TCGA data. Accordingly, our results showed no significant difference in  
425 ALKBH5 mRNA expression between non-cancerous and cancerous tissues. By contrast,  
426 our findings showed that NSCLC had a significantly lower FTO mRNA expression than  
427 non-cancerous tissues (Fig. 1A). We subsequently investigated the protein expression  
428 levels of ALKBH5 and FTO in non-cancerous lung alveolar tissue and corresponding  
429 NSCLC tissues using TMA of patient samples. Furthermore, our results showed that  
430 cancerous tissues had significantly higher H-scores for ALKBH5 and FTO than



431 non-cancerous tissues (Fig. 1B). ALKBH5 and FTO expression were evaluated in  
432 immortalized bronchial epithelial cells (BEAS2B) and lung cancer cell lines.  
433 Consequently, qPCR analysis demonstrated that ALKBH5 mRNA expression was  
434 higher in lung cancer cell lines except for LC-2/ad and RERF-LC-MS, whereas FTO  
435 mRNA expression was lower in lung cancer cell lines except for HLC-1, ABC1, and  
436 PC3 (Fig. 1C). Western blot analysis demonstrated that ALKBH5 was endogenously  
437 expressed in all lung cancer cell lines and FTO was expressed in almost all lung cancer  
438 cell lines except HLC-1 (Fig. 1D). IHC analysis showed that ALKBH5 and FTO were  
439 mainly localized in the nucleus of the cells (Fig. 1E). Furthermore, immunofluorescence  
440 analysis showed that ALKBH5 was localized in the nucleus of PC9 cells overexpressing  
441 ALKBH5 (Fig. 1F). We analyzed the clinical characteristics of 627 NSCLC cases used  
442 in IHC of TMA in the context of ALKBH5 or FTO expression in tumors of the HUSM  
443 cohort (Table S2). The median age was 68 (range, 23–88) years; 430 (68.6%) patients  
444 were male and 184 (29.3%) had never smoked. The tumors were histologically  
445 classified as adenocarcinoma (n = 413, 65.9%), squamous cell carcinoma (n = 170,  
446 27.1%), or other histological types (n = 44, 7.0%). A total of 395 (63.0%) patients had  
447 stage I disease, whereas 127 (20.3%) cases had EGFR mutations. Postoperative  
448 adjuvant chemotherapy was prescribed to 258 (41.1%) patients. The median H-score

449 values for ALKBH5 and FTO expression were 110 (0–225, range) and 65 (0–281),  
450 respectively, with high ALKBH5 protein expression being correlated with high FTO  
451 protein expression ( $r = 0.41$ ) (Fig. S1A). Based on the median value, cases were divided  
452 into “high” and “low” expression groups, after which their association with clinical data  
453 as well as prognostic significance was examined. Lymph node metastasis, chemotherapy,  
454 and EGFR status significantly differed depending on ALKBH5 expression, whereas  
455 tumor status, lymph node metastasis, pathological stage, chemotherapy, and EGFR  
456 status significantly differed depending on FTO expression. Kaplan–Meier curves  
457 showed that patients with high ALKBH5 expression had significantly worse survival  
458 than those with low ALKBH5 expression (Fig. 1G: log-rank  $p = 0.0009$  for OS; Fig.  
459 S1B: log-rank  $p = 0.0008$  for RFS). Conversely, Kaplan–Meier curves showed no  
460 significant difference in survival between the low and high FTO expression groups (Fig.  
461 1G: log-rank  $p = 0.20$  for OS, Fig. S1C: log-rank  $p = 0.07$  for RFS). Univariate analysis  
462 revealed high ALKBH5 expression as a predictor of unfavorable OS (HR, 1.675; 95%  
463 CI, 1.230–2.521). Moreover, multivariate analysis of age, sex, smoking status, histology,  
464 pathological stage, and ALKBH5 expression revealed that ALKBH5 expression was an  
465 independent prognostic factor associated with unfavorable OS (HR, 1.468; 95% CI,  
466 1.039–2.073) (Table S3). To validate the prognostic value of ALKBH5 and FTO in

467 other cohorts of patients with NSCLC, the lung cancer database in the Kaplan–Meier  
468 plotter was used. Accordingly, Kaplan–Meier curves showed that patients with high  
469 ALKBH5 expression had a significantly worse survival than those with low ALKBH5  
470 expression (Fig. S1D: log-rank  $p = 0.014$  for OS). In contrast, Kaplan–Meier curves  
471 showed that patients with high FTO expression had significantly favorable survival  
472 compared with those with low FTO expression (log-rank  $p < 0.0001$  for OS) (Fig. S1E).  
473 These observations suggested that ALKBH5 played a critical role in the poor prognosis  
474 of patients with NSCLC.

475

#### 476 **ALKBH5 knockdown suppressed cell proliferation in NSCLC**

477 To investigate the impact of ALKBH5 and FTO deficiency in lung cancer cell function,  
478 ALKBH5 and FTO were knocked down in PC9 and A549 cells using small interfering  
479 RNA (siRNA). Based on knockdown efficacy, ALKBH5 siRNA no. 1 (siALKBH5#1)  
480 and siRNA no. 3 (siALKBH5#3) and FTO siRNA no.1 (siFTO#1) and siRNA no. 3  
481 (siFTO#3) were used in subsequent knockdown experiments (Fig. 2A, 2B, and S2A).  
482 ALKBH5 knockdown significantly suppressed the proliferation of PC9 and A549 cells  
483 (Fig. 2C). By contrast, FTO knockdown showed no significant suppressive effects on  
484 the proliferation of PC9 and A549 cells (Fig. 2D). Thereafter, we assessed migration

485 abilities in ALKBH5-knockdown cells. Accordingly, the transwell migration assay  
486 showed no significant reduction in the migratory PC9 and A549 cells (Fig. 2E).  
487 Moreover, the wound-healing assay showed that ALKBH5 knockdown promoted no  
488 significant reduction in the migration ability of PC9 and A549 cells (Fig. 2F and 2G).  
489 Together with the prognostic value of ALKBH5 in NSCLC, these observations  
490 suggested that ALKBH5 played a cancer-promoting role by regulating cell proliferation.

491 To subsequently examine the mechanism by which ALKBH5 knockdown  
492 suppressed cell proliferation, cell cycle, and apoptosis analyses were performed using  
493 flow cytometry. Accordingly, ALKBH5 knockdown significantly increased the number  
494 of PC9 cells in the G1 phase and reduced the number of PC9 cells in the G2/M phase  
495 with a consistent result of two different sequences of siRNAs (Fig.3A and 3B). On the  
496 other hand, the number of A549 cells in the G1 phase did not show significant  
497 differences by ALKBH5 knockdown with siALKBH5#1 and significantly increased by  
498 ALKBH5 knockdown with siALKBH5#3. The number of A549 cells in the G2/M phase  
499 did not show significant differences by ALKBH5 knockdown with a consistent result of  
500 two different sequences of siRNAs (Fig. 3C, 3D). ALKBH5 knockdown increased the  
501 number of apoptotic PC9 cells (Fig. 3E and 3F). Furthermore, under drug-induced  
502 apoptosis via cisplatin and gefitinib administration, ALKBH5 knockdown also

503 increased the number of apoptotic PC9 cells (Fig. 3G and 3H). ALKBH5 knockdown  
504 also increased the number of apoptotic A549 cells (Fig. 3I and 3J). Moreover, ALKBH5  
505 knockdown increased the number of apoptotic A549 cells with cisplatin (Fig. 3K and  
506 3L). Overall, the aforementioned data showed that ALKBH5 knockdown suppressed  
507 cell proliferation through G1 phase arrest and/or apoptosis induction in NSCLC cell  
508 lines.

509

#### 510 **ALKBH5 overexpression promoted cell proliferation in immortalized cells**

511 To analyze whether ALKBH5 overexpression in immortalized cells promoted malignant  
512 changes in cell function, BEAS2B and HEK293 cells, which are immortalized cells,  
513 were infected with a doxycycline-inducible vector, pRetroX-TetOne puro-ALKBH5.  
514 ALKBH5 overexpression was confirmed in HEK293 and BEAS2B cells (Fig. 4A) and  
515 significantly enhanced HEK293 and BEAS2B cell proliferation (Fig. 4B and 4C). In  
516 contrast, ALKBH5 overexpression showed no significant effects on the migration  
517 ability of HEK293 (Fig. 4D and 4E) and BEAS2B cells (Fig. 4F and 4G). The  
518 aforementioned results provided further evidence that ALKBH5 played a  
519 cancer-promoting role by regulating cell proliferation.

520

521 **ALKBH5 altered the abundance of m<sup>6</sup>A modification in polyA-enriched RNA**

522 To assess the amount of m<sup>6</sup>A in cells, a quantitative evaluation of m<sup>6</sup>A was performed  
523 via LC–MS/MS using polyA-enriched RNA extracted from PC9 cells with altered  
524 ALKBH5 gene expression (Fig. 5A). We investigated the technical variability that  
525 occurs when adenosine and N<sup>6</sup>-methyladenosine-d3 (m<sup>6</sup>A-d3) are used as internal  
526 standards. Although both adenosine (A) and m<sup>6</sup>A-d3 showed a strong positive  
527 correlation with m<sup>6</sup>A ( $r = 0.92$  and  $r = 0.90$ ), the measurement with m<sup>6</sup>A-d3 as the  
528 internal standard showed less technical variability than that with A as the internal  
529 standard (Fig. S3A–C). Hence, we used m<sup>6</sup>A-d3 as the internal control for subsequent  
530 experiments. ALKBH5 knockdown increased m<sup>6</sup>A modification in PC9 and A549 cells  
531 (Fig. 5B and 5C), whereas ALKBH5 overexpression reduced m<sup>6</sup>A modification in a  
532 doxycycline concentration-dependent manner in PC9 cells (Fig. 5D, S3D, and S3E).  
533 Moreover, ALKBH5 overexpression reduced m<sup>6</sup>A modification regardless of the time  
534 that had elapsed after doxycycline addition (Fig. 5E). Furthermore, ALKBH5  
535 overexpression reduced m<sup>6</sup>A modification in BEAS2B and HEK293 cells (Fig. 5F). The  
536 aforementioned results presented evidence suggesting that ALKBH5 alters the global  
537 m<sup>6</sup>A abundance in cells.

538

539 **ALKBH5 regulated the expression of cell proliferation-related genes**

540 An expression microarray analysis was herein performed to investigate gene expression  
541 profiles in ALKBH5-knockdown PC9 cells with two different sequences of siRNA  
542 (ALKBH5#1 and ALKBH5#3). Differentially expressed genes (DEGs) were defined as  
543 those with a fold change of  $>1.5$  or  $<0.67$  ( $P < 0.01$ ). A total of 697 DEGs were detected  
544 for ALKBH5#1 comprising 392 upregulated and 305 downregulated genes (Fig. 6A),  
545 whereas 1394 DEGs were detected for ALKBH5#3 comprising 803 upregulated and  
546 591 downregulated genes (Fig. 6B). Moreover, 82 upregulated genes (Table S4) and 47  
547 downregulated genes (Table S5) overlapped between ALKBH5#1 and ALKBH5#3 (Fig.  
548 6C). Except for ALKBH5, genes associated with m<sup>6</sup>A modification described in a  
549 previous review (48) were not included in the overlapped DEGs (Table S6). GSEA with  
550 the hallmark gene set revealed that the PC9 cells transfected with siALKBH5#1 and  
551 siALKBH5#3 had a more enriched expression of genes involved in cell cycle, such as  
552 MYC\_TARGETS\_V2, P53\_PATHWAY, and G2/M\_CHECKPOINT, than those  
553 transfected with siNC (Fig. S4A and S4B). We selected 10 DEGs associated with cell  
554 proliferation or apoptosis based on their description in the NCBI gene summary (49-54)  
555 or by referring to previous literature (55-58) and confirmed the upregulation of E2F1,  
556 GADD45A, TIMP3, and CDKN1A and downregulation of CASP14 and CCNG2 by

557 qPCR (Fig. 6D). The aforementioned results revealed that ALKBH5 regulated the  
558 expression of genes associated with cell proliferation.

559

560 **ALKBH5 altered the abundance of m<sup>6</sup>A in the 3' UTR and regulated protein**  
561 **expression of target genes**

562 We performed m<sup>6</sup>A-specific methylated RNA immunoprecipitation microarray analysis  
563 in PC9 cells on an Arraystar Human mRNA&lncRNA Epitranscriptomic Microarray to  
564 comprehensively examine whether differentially regulated genes were associated with  
565 m<sup>6</sup>A modification using unfragmented total RNA. The median methylation level in  
566 unfragmented total RNA was 50.4% (6.8%–94.5%) (Fig. S5A). A positive correlation  
567 was observed between the methylation level in unfragmented total RNA and the RNA  
568 length of each transcript ( $r = 0.35$ ) (Fig. S5B). Moreover, a negative correlation was  
569 noted between the rate at which ALKBH5 knockdown increased m<sup>6</sup>A modification  
570 (methylation level in siALKBH5 – methylation level in siNC) and methylation level at  
571 baseline (methylation level in siNC) ( $r = -0.35$ ) (Fig. S5C). The volcano plot showed  
572 that 1 RNA was hypermethylated by ALKBH5#1 knockdown (fold change > 1.5,  $P <$   
573 0.01) (Fig. S5D), whereas 28 RNAs were hypermethylated by ALKBH5#3 knockdown  
574 (fold change > 1.5;  $P < 0.01$ ) (Fig. S5E). No hypermethylated genes overlapped



575 between ALKBH5#1 and ALKBH5#3 knockdown with a fold change threshold of  $>1.5$   
576 ( $P < 0.01$ ) (Fig. S5F). GSEA showed no common hallmark gene set with an FDR  
577 q-value of  $< 0.25$  for PC9 cells transfected with siALKBH5#1 and siALKBH5#3  
578 compared with the control group (Fig. S5G).

579         Considering that the m<sup>6</sup>A levels of unfragmented RNAs regulated by ALKBH5  
580 are affected by the baseline RNA length and endogenous m<sup>6</sup>A level, we performed  
581 methylated RNA immunoprecipitation (MeRIP) with m<sup>6</sup>A antibody using fragmented  
582 polyA-enriched RNA in ALKBH5-knockdown PC9 cells to investigate focal m<sup>6</sup>A  
583 alterations in the mRNA. The fragmentation conditions were optimized (Fig. S6A), and  
584 the m<sup>6</sup>A changes in the positive and NC were confirmed through qPCR using the  
585 primers included in the Magna MeRIP m<sup>6</sup>A Kit (Millipore) (Fig.S6B). To verify the  
586 accuracy of the MeRIP experiment, we selected MFAP5 out of the 11 hypermethylated  
587 genes ( $>1.5$  fold change and  $P < 0.05$ ) in the human mRNA&lncRNA Epitranscriptomic  
588 Microarray (Table S7) and analyzed the m<sup>6</sup>A target site via qPCR. Specific primers  
589 were designed for the predicted m<sup>6</sup>A-harboring regions, and MeRIP qPCR confirmed  
590 that ALKBH5 knockdown increased m<sup>6</sup>A levels in the 3' UTR of MFAP5 (Fig. S6C).  
591 Thereafter, MeRIP qPCR was performed in six DEGs verified using qPCR with  
592 ALKBH5-knockdown PC9 cells. Our results showed increased m<sup>6</sup>A levels in the 3'

593 UTRs of CDKN1A, TIMP3, E2F1, and CCNG2 in ALKBH5-knockdown PC9 cells  
594 (Fig. 6E–6G). ALKBH5 knockdown with two different sequences of siRNAs also  
595 increased the m<sup>6</sup>A level in the 5'UTR of CDKN1A (Fig. 6F). The aforementioned  
596 results of the MeRIP qPCR suggest that ALKBH5 targeted the 3' UTRs of m<sup>6</sup>A in these  
597 four transcripts (Fig. 7A).

598       Next, the protein expression levels of the potential target transcript of ALKBH5  
599 were quantified by western blot analysis. Accordingly, our results showed that  
600 CDKN1A (p21) expression increased independent of p53 in ALKBH5-knockdown PC9  
601 cells, whereas TIMP3 expression increased in ALKBH5-knockdown A549 cells (Fig.  
602 7B).

603       To investigate the effect of both CDKN1A in PC9 and TIMP3 in A549 on cell  
604 proliferation in ALKBH5-deficient lung cancer cell lines, we confirmed the reduced  
605 expression using siRNA (Fig. 7C, 7D, S7A, and S7B). The knockdown of CDKN1A  
606 partly rescues the decreased cell proliferation in ALKBH5-deficient PC9 cells (Fig. 7E).  
607 The knockdown of TIMP3 also partly rescues the decreased cell proliferation in  
608 ALKBH5-deficient A549 cells (Fig. 7F). These results suggest that CDKN1A and  
609 TIMP3 are important targets for cell proliferation and are required for cell number  
610 reduction by repression of ALKBH5.

611           Additionally, we evaluated the expression of ALKBH5 target mRNAs CDKN1A  
612   and TIMP3 in lung cancer using the TCGA dataset. Accordingly, cancerous tissues  
613   (high ALKBH5 expression) had lower CDKN1A and TIMP3 expression than  
614   noncancerous tissue (low ALKBH5 expression; Fig. S7C and S7D). The results were  
615   consistent with the experimental results of CDKN1A and TIMP3 knockdown described  
616   above.

617

618   **IGF2BPs were required for ALKBH5 regulation of target mRNA expression via**  
619   **stabilization of mRNA and affected cell proliferation**

620   IGF2BP1, IGF2BP2, IGF2BP3 (IGF2BPs), and YTHDF2 are well-known  
621   m<sup>6</sup>A-recognizing RNA-binding proteins and readers of m<sup>6</sup>A that have been known to  
622   stabilize or destabilize mRNA. The expression of proteins of IGF2BPs in a series of cell  
623   lines was analyzed by western blotting, and the results showed differences in their  
624   expression in lung cancer cells and immortalized bronchial epithelial cells according to  
625   the cell lines (Fig.8A).

626           Thereafter, ALKBH5 and IGF2BPs were knocked down with siRNA to  
627   investigate the association between ALKBH5 and IGF2BPs and the expression of  
628   CDKN1A (p21) or TIMP3 (Fig. S8A–D). Western blot analysis revealed that IGF2BPs

629 knockdown sufficiently reduced the expression of IGF2BPs (Fig. 8B), although some of  
630 them appeared to be weakly expressed as shown in Figure 8A. Accordingly, ALKBH5  
631 knockdown increased the mRNA expressions of CDKN1A in PC9 cells and TIMP3 in  
632 A549 cells. The knockdown of IGF2BPs alone did not significantly change the  
633 expression of CDKN1A and TIMP3 (Fig. S8E), but that of both ALKBH5 and IGF2BPs  
634 offset the increased expression of CDKN1A and TIMP3 (Fig. 8C). We further analyzed  
635 the protein expression of YTHDF2 in lung cancer cell lines (Fig. 8D) and conducted  
636 transfection of siRNA for YTHDF2 as previously described (59), which confirmed that  
637 upregulated expression of CDKN1A by ALKBH5 knockdown was increased by  
638 YTHDF2 knockdown in PC9, which suggested that m<sup>6</sup>A of CDKN1A may be affected  
639 by both IGF2BPs and YTHDF2 reversibly (Fig. 8E and S8F). Actinomycin D assay  
640 showed that ALKBH5 knockdown stabilized CDKN1A mRNA in PC9 cells, and this  
641 stabilization was offset by the knockdown of IGF2BPs. ALKBH5 knockdown also  
642 stabilized TIMP3 mRNA in A549 cells, although not statistically significant, and this  
643 stabilization was decreased by IGF2BP3 knockdown (Fig. 8F). These results suggest  
644 that these alterations in mRNA expression were offset by a double knockdown of both  
645 ALKBH5 and one of the IGF2BPs, and the decline of mRNAs was, at least partly,  
646 owing to the destabilization of these mRNAs by one of the IGF2BPs.

647           Considering that the interaction between ALKBH5 and IGF2BPs was found to  
648 regulate the expression of genes associated with cell proliferation, cell proliferation  
649 assays were conducted using ALKBH5- and IGF2BPs-knockdown cells. The  
650 knockdown of IGF2BPs did not cause a significant change in cell proliferation in PC9  
651 cells, but the knockdown of IGF2BPs decreased cell proliferation in A549 cells (Fig.  
652 S8G). Notably, ALKBH5 knockdown reduced cell proliferation in PC9 and A549 cells  
653 and this reduction of cell proliferation was offset by IGF2BPs knockdown (Fig. 8G).  
654 These results suggest that the increased effect of cell proliferation upon simultaneous  
655 knockdown of IGF2BPs and ALKBH5 cannot be explained by the effect of IGF2BPs  
656 alone. Overall, our results support the hypothesis that IGF2BPs are required for  
657 ALKBH5 regulation of target mRNA expression and cell proliferation.

658

## 659 **Discussion**

660           The current study revealed that ALKBH5 promoted poor survival and cell  
661 proliferation in patients with NSCLC. Mechanistically, ALKBH5 knockdown had been  
662 found to increase the expression of CDKN1A (p21) and TIMP3 by altering mRNA  
663 stability in PC9 and A549 cells via m<sup>6</sup>A change. Moreover, these changes in mRNA  
664 stability were counteracted by IGF2BPs knockdown. The aforementioned results

665 suggest that the recognition of target transcripts by IGF2BPs stabilizes the mRNA of  
666 CDKN1A (p21) or TIMP3 and subsequently increases their expressions, thereby  
667 regulating cell proliferation, cell cycle, and apoptosis in lung cancer cell lines.

668 Over the last decade, considerable progress has been made on research  
669 regarding the molecular mechanism for m<sup>6</sup>A-mediated carcinogenesis of ALKBH5.  
670 Nevertheless, previous studies on ALKBH5 have shown conflicting results regarding  
671 the carcinogenic mechanisms of ALKBH5 across several cancers (28-36). Several  
672 previous studies have reported contradictory results regarding ALKBH5, suggesting that  
673 it acts as either an oncogenic factor or a tumor suppressor in NSCLC (40-42). The  
674 current study concluded that ALKBH5 exerted cancer-promoting effects in NSCLC by  
675 suppressing CDKN1A (p21) or TIMP3. On the other hand, although both ALKBH5 and  
676 FTO are classified as m<sup>6</sup>A demethylases, there was a discrepancy in survival between  
677 ALKBH5 and FTO (Fig. 1G). Indeed, there was a trend toward a worse prognosis in the  
678 FTO high-expression group, but the difference was not significant (Fig. 1G).  
679 Furthermore, the knockdown of FTO did not suppress the proliferation of lung cancer  
680 cells, but the knockdown of ALKBH5 inhibited it. Thus, ALKBH5 appears to have a  
681 more effective impact on carcinogenesis. Certainly, our immunostaining results also  
682 revealed a weak correlation between ALKBH5 and FTO expression, but some cases had

683 different intensities of expression among proteins (Fig. S1A). A possible background  
684 mechanism is that each eraser protein may regulate a different target demethylated gene.  
685 Independent changes of ALKBH5 and FTO expression would allow for complex  
686 regulation of downstream gene expression via m<sup>6</sup>A.

687 CDKN1A (p21) functions as a cell growth suppressor by inhibiting cell cycle  
688 progression. Multiple transcription factors, ubiquitin ligases, and protein kinases  
689 regulate the transcription, stability, and cellular localization of CDKN1A (p21) (60). A  
690 previous study showed that ALKBH5 knockdown increased m<sup>6</sup>A modification and  
691 mRNA stability of CDKN1A, which subsequently increased p21 protein expression and  
692 acted as a tumor suppressor in esophageal cancer (32). Similarly, our findings showed  
693 that ALKBH5 knockdown in PC9 cells acted as a tumor suppressor by the upregulation  
694 of CDKN1A (p21) via m<sup>6</sup>A alteration. We also showed that p21 upregulation was  
695 p53-independent and reduced cell proliferation in ALKBH5-deficient PC9 cells was  
696 rescued by CDKN1A knockdown, which indirectly reinforced our finding that  
697 CDKN1A (p21) upregulation was critical for an m<sup>6</sup>A-mediated response. Our results  
698 further indicated a novel mechanism wherein changes in CDKN1A expression via  
699 ALKBH5 knockdown were rescued by IGF2BPs knockdown, which supports our  
700 finding that alterations in CDKN1A (p21) expression were mediated by m<sup>6</sup>A.

701           The current study identified TIMP3 as another important target molecule  
702 downstream of ALKBH5. A previous study showed TIMP3 had several anticancer  
703 properties, including apoptosis induction and antiproliferative, antiangiogenic, and  
704 antimetastatic activities. The expression of TIMP3 is regulated by transcription factors  
705 and histone acetylation (61). Several studies have shown that TIMP3 acts as a tumor  
706 suppressor in lung cancer (62, 63). Indeed, TIMP3 knockdown increased cell  
707 proliferation in A549 cells and rescued cell proliferation in ALKBH5-deficient A549  
708 cells. Moreover, a previous report using A549 cell lines showed that ALKBH5  
709 knockdown increases TIMP3 mRNA stability and TIMP3 expression via m<sup>6</sup>A  
710 modification (41). Similarly, the current study also confirmed that ALKBH5  
711 knockdown increased mRNA stability, which increased TIMP3 protein expression and  
712 acted as a tumor suppressor in A549 cells. Furthermore, our experimental data for the  
713 first time showed that the ALKBH5 knockdown-induced increase in TIMP3 was  
714 rescued by IGF2BPs, strongly suggesting that alterations in TIMP3 expression were  
715 mediated by m<sup>6</sup>A.

716           IGF2BPs are known as m<sup>6</sup>A-recognizing RNA-binding proteins that stabilize  
717 m<sup>6</sup>A-containing RNA. Previous studies have reported that IGF2BPs have oncogenic  
718 properties. Studies on lung cancer have associated IGF2BPs with cancer progression



719 and poor prognosis (64-69). Notably, a previous report showed that ALKBH5-mediated  
720 m<sup>6</sup>A modification of LY6/PLAUR Domain Containing 1 (LYPD1) is recognized by  
721 IGF2BP1 and enhances the stability of LYPD1 mRNA in hepatocellular carcinoma (35).  
722 Moreover, recent RNA-binding protein immunoprecipitation-sequencing analysis using  
723 HEK293T showed that the binding site of IGF2BPs is mainly distributed in the 3' UTRs  
724 and that the target of IGF2BPs preferentially binds to the consensus sequence of  
725 UGGAC in the target mRNA (26). These findings support our experimental hypothesis  
726 that IGF2BPs recognize the m<sup>6</sup>A in the 3' UTRs of CDKN1A or TIMP3 because  
727 UGGAC is present within three locations in the 3' UTRs of CDKN1A and two locations  
728 in the 3' UTRs of TIMP3. In addition, IGF2BPs regulate RNA expression by  
729 recognizing m<sup>6</sup>A to affect mRNA stability. Their binding sites for m<sup>6</sup>A modification are  
730 enriched in the 3'UTR. On the other hand, the distribution of binding peaks differs  
731 somewhat depending on the subclass of IGF2BPs, and nearly 50% of the targets in each  
732 IGF2BP subclass are different in the other subclass (26). Our findings also showed that  
733 the expression of IGF2BPs significantly differed between cell lines. It is possible that  
734 IGF2BP subclasses with different m<sup>6</sup>A targets play a role in the more complex  
735 regulation of the expression of various target genes by changing their expression levels  
736 depending on cell types. As a result, although PC9 and A549 are both lung

737 adenocarcinoma cell lines, the protein expression of their target genes such as CDKN1A  
738 (p21) or CCNG2 may have been different (Fig. 7B).

739           In our epitranscriptomic microarray, site-specific changes in m<sup>6</sup>A modification  
740 could not be determined since sample RNAs were not fragmented. Considering the  
741 correlation between RNA length and the ratio of m<sup>6</sup>A-modified transcripts, the  
742 epitranscriptomic microarray analysis using unfragmented RNA does not allow the  
743 evaluation of multiple m<sup>6</sup>A modifications occurring within a single transcript. As such,  
744 we conducted MeRIP q-PCR with fragmented RNAs to evaluate site-specific  
745 differential m<sup>6</sup>A modification. Nevertheless, the epitranscriptomic microarray with  
746 unfragmented RNAs provided a holistic view of the degree of m<sup>6</sup>A modification for  
747 each transcript, establishing a landscape for m<sup>6</sup>A modification by ALKBH5 knockdown  
748 (Fig. S5A–E and S5G).

749           FTO inhibitors have been shown to suppress the progression of acute myeloid  
750 leukemia and glioblastoma *in vivo* (70, 71). In contrast, the antitumor effects of  
751 ALKBH5 inhibitors, which enhanced the efficacy of cancer immunotherapy, have only  
752 been confirmed in melanomas (72). Furthermore, several experimental facts have  
753 shown that ALKBH5 is associated with the malignant transformation of cancer (28-34),  
754 indicating that ALKBH5 inhibitors can be a target of tumor-agnostic therapy. However,

755 it should be noted that ALKBH5 inhibitors may cause unexpected side effects in  
756 unknown target genes given that ALKBH5 inhibition alters the m<sup>6</sup>A modification of  
757 numerous transcripts and the expression of several genes.

758           Although the current study provided abundant evidence to conclude the  
759 remarkable role of the m<sup>6</sup>A-regulated ALKBH5 and IGF2BPs axis in NSCLC, several  
760 limitations warrant consideration. First, the possibility that off-target effects of siRNAs  
761 may have affected the results cannot be ruled out because the number of nonoverlapping  
762 DEGs was not small in the expression microarray results (Fig. 6C). To maximally  
763 eliminate the influence of the off-target effect, we used two different sequences of  
764 siRNA. Secondly, our epitranscriptomic microarray findings showed that  
765 ALKBH5-knockdown reduced m<sup>6</sup>A methylation levels in approximately half of the  
766 transcripts. Although the detailed mechanism remains unclear, hypomethylation may  
767 occur when some of the m<sup>6</sup>A-rich transcripts bind to YTHDF2 and YTHDC2, reducing  
768 the stability of RNA containing m<sup>6</sup>A. Consequently, the m<sup>6</sup>A-modified transcript then  
769 undergoes degradation over time. In other words, the target's transcript may also differ  
770 depending on the elapsed time after the perturbation of ALKBH5. However, the current  
771 study did not investigate the chronological alteration of the m<sup>6</sup>A abundance of each  
772 transcript following ALKBH5 knockdown. Third, as mentioned earlier, CDKN1A and

773 TIMP3 are also regulated by transcription factors or miRNA, and we cannot deny the  
774 possibility that mechanisms other than m<sup>6</sup>A promoted changes in CDKN1A (p21) and  
775 TIMP3 expression. Nonetheless, the finding that IGF2BPs knockdown rescued the  
776 CDKN1A and TIMP3 expression supports our proposition that the changes in CDKN1A  
777 (p21) and TIMP3 expression were mediated via m<sup>6</sup>A.

778

## 779 **Conclusions**

780 The current study revealed that increased ALKBH5 expression was an independent  
781 unfavorable prognostic factor in NSCLC. Moreover, upregulation of ALKBH5 in  
782 NSCLC reduced m<sup>6</sup>A modifications on the 3' UTR of specific genes. The loss of m<sup>6</sup>A  
783 decreased the opportunity for recognition by IGF2BPs and destabilized the target  
784 transcripts such as CDKN1A (p21) and TIMP3. Downregulation of CDKN1A (p21) and  
785 TIMP3 induced cell cycle alteration and inhibited apoptosis. Our results suggest that the  
786 ALKBH5–IGF2BPs axis promotes cell proliferation and tumorigenicity, which in turn  
787 causes the unfavorable prognosis of NSCLC. Our findings provide a novel insight into  
788 the pathophysiological mechanisms of m<sup>6</sup>A epitranscriptomic modification in NSCLC  
789 (Fig. 8H). Further *in vivo* studies are nonetheless required to determine whether  
790 ALKBH5 inhibitors can be incorporated in the treatment of NSCLC in the near future.

791

792 **List of abbreviations**

793 m<sup>6</sup>A: N<sup>6</sup>-methyladenosine; NSCLC: non-small-cell lung cancer; MeRIP: Methylated

794 RNA immunoprecipitation; CI: Confidence interval; HR: Hazard ratio; UTRs: 3'

795 untranslated regions; METTL3: methyltransferase-like 3; METTL14:

796 Methyltransferase-like 14; WTAP: Wilms tumor 1-associated protein; RBM15:

797 RNA-binding motif protein 15; FTO: fat mass and obesity-related protein, ALKBH5:

798 AlkB homolog 5; YTHDC: YT521-B homology domain containing; HNRNPG:

799 heterogeneous nuclear ribonucleoprotein G; YTHDF: YT521-B homology domain

800 family; eIF3: eukaryotic initiation factor3; IGF2BP: insulin-like growth factor 2

801 mRNA-binding protein; m<sup>6</sup>Am: N<sup>6</sup>,2'-O-dimethyladenosine; TMA: Tissue microarray;

802 IHC: immunohistochemistry; TCGA: the Cancer Genome Atlas; RSEM: RNA-seq by

803 Expectation Maximization; DAPI: 4',6-diamidino-2-phenylindole; siNC: siRNA

804 control; NT: nontreated cells; DOX: doxycycline; OE: overexpression; NC: negative

805 control; CCK-8: Cell Counting Kit-8; SDS: sodium dodecyl sulfate; PI: propidium

806 iodide; LC-MS/MS: liquid chromatography-mass spectrometry/mass spectrometry;

807 m<sup>6</sup>A-d3: N<sup>6</sup>-methyladenosine-d3; A: adenosine; FDR: false discovery rate; GSEA:

808 Gene set enrichment analysis; GEO: Gene Expression Omnibus; NCBI: National Center

809 for Biotechnology Information; SD: standard deviation; OS: Overall survival; RFS:  
810 recurrence-free survival; ANOVA: analysis of variance; DEGs: differentially expressed  
811 genes; LYPD1: LY6/PLAUR Domain Containing 1

812

### 813 **References**

- 814 1. WHO report on cancer: setting priorities, investing wisely and providing care  
815 for all [Available from:  
816 <https://www.who.int/publications/i/item/who-report-on-cancer-setting-priorities-investing-wisely-and-providing-care-for-all>.  
817 g-wisely-and-providing-care-for-all.
- 818 2. Mok TS, Wu YL, Thongprasert S, Yang CH, Chu DT, Saijo N, et al. Gefitinib  
819 or carboplatin-paclitaxel in pulmonary adenocarcinoma. *N Engl J Med*.  
820 2009;361(10):947-57.
- 821 3. Shaw AT, Kim DW, Nakagawa K, Seto T, Crino L, Ahn MJ, et al. Crizotinib  
822 versus chemotherapy in advanced ALK-positive lung cancer. *N Engl J Med*.  
823 2013;368(25):2385-94.
- 824 4. Planchard D, Besse B, Groen HJM, Souquet P-J, Quoix E, Baik CS, et al.  
825 Dabrafenib plus trametinib in patients with previously treated BRAFV600E-mutant

- 826 metastatic non-small cell lung cancer: an open-label, multicentre phase 2 trial. The  
827 *Lancet Oncology*. 2016;17(7):984-93.
- 828 5. Shaw AT, Ou SH, Bang YJ, Camidge DR, Solomon BJ, Salgia R, et al.  
829 Crizotinib in ROS1-rearranged non-small-cell lung cancer. *N Engl J Med*.  
830 2014;371(21):1963-71.
- 831 6. Gandhi L, Rodriguez-Abreu D, Gadgeel S, Esteban E, Felip E, De Angelis F, et  
832 al. Pembrolizumab plus Chemotherapy in Metastatic Non-Small-Cell Lung Cancer. *N*  
833 *Engl J Med*. 2018;378(22):2078-92.
- 834 7. Carroll SM, Narayan P, Rottman FM. N6-methyladenosine residues in an  
835 intron-specific region of prolactin pre-mRNA. *Mol Cell Biol*. 1990;10(9):4456-65.
- 836 8. Dominissini D, Moshitch-Moshkovitz S, Schwartz S, Salmon-Divon M, Ungar  
837 L, Osenberg S, et al. Topology of the human and mouse m6A RNA methylomes  
838 revealed by m6A-seq. *Nature*. 2012;485(7397):201-6.
- 839 9. Liu J, Yue Y, Han D, Wang X, Fu Y, Zhang L, et al. A METTL3-METTL14  
840 complex mediates mammalian nuclear RNA N6-adenosine methylation. *Nat Chem Biol*.  
841 2014;10(2):93-5.

- 842 10. Ping XL, Sun BF, Wang L, Xiao W, Yang X, Wang WJ, et al. Mammalian  
843 WTAP is a regulatory subunit of the RNA N6-methyladenosine methyltransferase. *Cell*  
844 *Research*. 2014;24(2):177-89.
- 845 11. Yue Y, Liu J, Cui X, Cao J, Luo G, Zhang Z, et al. VIRMA mediates  
846 preferential m(6)A mRNA methylation in 3'UTR and near stop codon and associates  
847 with alternative polyadenylation. *Cell Discov*. 2018;4:10.
- 848 12. Patil DP, Chen CK, Pickering BF, Chow A, Jackson C, Guttman M, et al.  
849 m(6)A RNA methylation promotes XIST-mediated transcriptional repression. *Nature*.  
850 2016;537(7620):369-73.
- 851 13. Jia G, Fu Y, Zhao X, Dai Q, Zheng G, Yang Y, et al. N6-methyladenosine in  
852 nuclear RNA is a major substrate of the obesity-associated FTO. *Nat Chem Biol*.  
853 2011;7(12):885-7.
- 854 14. Zheng G, Dahl JA, Niu Y, Fedorcsak P, Huang CM, Li CJ, et al. ALKBH5 is a  
855 mammalian RNA demethylase that impacts RNA metabolism and mouse fertility. *Mol*  
856 *Cell*. 2013;49(1):18-29.
- 857 15. Mauer J, Luo X, Blanjoie A, Jiao X, Grozhik AV, Patil DP, et al. Reversible  
858 methylation of m(6)Am in the 5' cap controls mRNA stability. *Nature*.  
859 2017;541(7637):371-5.



- 860 16. Meyer KD, Saletore Y, Zumbo P, Elemento O, Mason CE, Jaffrey SR.  
861 Comprehensive analysis of mRNA methylation reveals enrichment in 3' UTRs and near  
862 stop codons. *Cell*. 2012;149(7):1635-46.
- 863 17. Tang C, Klukovich R, Peng H, Wang Z, Yu T, Zhang Y, et al.  
864 ALKBH5-dependent m6A demethylation controls splicing and stability of long 3'-UTR  
865 mRNAs in male germ cells. *Proc Natl Acad Sci U S A*. 2018;115(2):E325-E33.
- 866 18. Xiao W, Adhikari S, Dahal U, Chen YS, Hao YJ, Sun BF, et al. Nuclear m(6)A  
867 Reader YTHDC1 Regulates mRNA Splicing. *Mol Cell*. 2016;61(4):507-19.
- 868 19. Liu N, Dai Q, Zheng G, He C, Parisien M, Pan T.  
869 N(6)-methyladenosine-dependent RNA structural switches regulate RNA-protein  
870 interactions. *Nature*. 2015;518(7540):560-4.
- 871 20. Liu N, Zhou KI, Parisien M, Dai Q, Diatchenko L, Pan T. N6-methyladenosine  
872 alters RNA structure to regulate binding of a low-complexity protein. *Nucleic Acids Res*.  
873 2017;45(10):6051-63.
- 874 21. Li A, Chen YS, Ping XL, Yang X, Xiao W, Yang Y, et al. Cytoplasmic m(6)A  
875 reader YTHDF3 promotes mRNA translation. *Cell Res*. 2017;27(3):444-7.

- 876 22. Choe J, Lin S, Zhang W, Liu Q, Wang L, Ramirez-Moya J, et al. mRNA  
877 circularization by METTL3-eIF3h enhances translation and promotes oncogenesis.  
878 Nature. 2018;561(7724):556-60.
- 879 23. Wang X, Zhao BS, Roundtree IA, Lu Z, Han D, Ma H, et al.  
880 N(6)-methyladenosine Modulates Messenger RNA Translation Efficiency. Cell.  
881 2015;161(6):1388-99.
- 882 24. Shi H, Wang X, Lu Z, Zhao BS, Ma H, Hsu PJ, et al. YTHDF3 facilitates  
883 translation and decay of N(6)-methyladenosine-modified RNA. Cell Res.  
884 2017;27(3):315-28.
- 885 25. Wang X, Lu Z, Gomez A, Hon GC, Yue Y, Han D, et al.  
886 N6-methyladenosine-dependent regulation of messenger RNA stability. Nature.  
887 2014;505(7481):117-20.
- 888 26. Huang H, Weng H, Sun W, Qin X, Shi H, Wu H, et al. Recognition of RNA  
889 N(6)-methyladenosine by IGF2BP proteins enhances mRNA stability and translation.  
890 Nat Cell Biol. 2018;20(3):285-95.
- 891 27. Ma L, Chen T, Zhang X, Miao Y, Tian X, Yu K, et al. The m(6)A reader  
892 YTHDC2 inhibits lung adenocarcinoma tumorigenesis by suppressing  
893 SLC7A11-dependent antioxidant function. Redox Biol. 2021;38:101801.

- 894 28. Zhang S, Zhao BS, Zhou A, Lin K, Zheng S, Lu Z, et al. m(6)A Demethylase  
895 ALKBH5 Maintains Tumorigenicity of Glioblastoma Stem-like Cells by Sustaining  
896 FOXM1 Expression and Cell Proliferation Program. *Cancer Cell*. 2017;31(4):591-606  
897 e6.
- 898 29. Chen S, Zhou L, Wang Y. ALKBH5-mediated m(6)A demethylation of lncRNA  
899 PVT1 plays an oncogenic role in osteosarcoma. *Cancer Cell Int*. 2020;20:34.
- 900 30. Guo T, Liu DF, Peng SH, Xu AM. ALKBH5 promotes colon cancer  
901 progression by decreasing methylation of the lncRNA NEAT1. *Am J Transl Res*.  
902 2020;12(8):4542-9.
- 903 31. Jiang Y, Wan Y, Gong M, Zhou S, Qiu J, Cheng W. RNA demethylase  
904 ALKBH5 promotes ovarian carcinogenesis in a simulated tumour microenvironment  
905 through stimulating NF-kappaB pathway. *J Cell Mol Med*. 2020;24(11):6137-48.
- 906 32. Nagaki Y, Motoyama S, Yamaguchi T, Hoshizaki M, Sato Y, Sato T, et al. m(6)  
907 A demethylase ALKBH5 promotes proliferation of esophageal squamous cell carcinoma  
908 associated with poor prognosis. *Genes Cells*. 2020;25(8):547-61.
- 909 33. Pu X, Gu Z, Gu Z. ALKBH5 regulates IGF1R expression to promote the  
910 Proliferation and Tumorigenicity of Endometrial Cancer. *J Cancer*.  
911 2020;11(19):5612-22.

- 912 34. Zhang X, Wang F, Wang Z, Yang X, Yu H, Si S, et al. ALKBH5 promotes the  
913 proliferation of renal cell carcinoma by regulating AURKB expression in an  
914 m(6)A-dependent manner. *Ann Transl Med.* 2020;8(10):646.
- 915 35. Chen Y, Zhao Y, Chen J, Peng C, Zhang Y, Tong R, et al. ALKBH5 suppresses  
916 malignancy of hepatocellular carcinoma via m(6)A-guided epigenetic inhibition of  
917 LYPD1. *Mol Cancer.* 2020;19(1):123.
- 918 36. Guo X, Li K, Jiang W, Hu Y, Xiao W, Huang Y, et al. RNA demethylase  
919 ALKBH5 prevents pancreatic cancer progression by posttranscriptional activation of  
920 PER1 in an m6A-YTHDF2-dependent manner. *Mol Cancer.* 2020;19(1):91.
- 921 37. Liu J, Ren D, Du Z, Wang H, Zhang H, Jin Y. m(6)A demethylase FTO  
922 facilitates tumor progression in lung squamous cell carcinoma by regulating MZF1  
923 expression. *Biochem Biophys Res Commun.* 2018;502(4):456-64.
- 924 38. Li J, Han Y, Zhang H, Qian Z, Jia W, Gao Y, et al. The m6A demethylase FTO  
925 promotes the growth of lung cancer cells by regulating the m6A level of USP7 mRNA.  
926 *Biochem Biophys Res Commun.* 2019;512(3):479-85.
- 927 39. Ding Y, Qi N, Wang K, Huang Y, Liao J, Wang H, et al. FTO Facilitates Lung  
928 Adenocarcinoma Cell Progression by Activating Cell Migration Through mRNA  
929 Demethylation. *Onco Targets Ther.* 2020;13:1461-70.

- 930 40. Jin D, Guo J, Wu Y, Yang L, Wang X, Du J, et al. m(6)A demethylase ALKBH5  
931 inhibits tumor growth and metastasis by reducing YTHDFs-mediated YAP expression  
932 and inhibiting miR-107/LATS2-mediated YAP activity in NSCLC. *Mol Cancer*.  
933 2020;19(1):40.
- 934 41. Zhu Z, Qian Q, Zhao X, Ma L, Chen P. N(6)-methyladenosine ALKBH5  
935 promotes non-small cell lung cancer progress by regulating TIMP3 stability. *Gene*.  
936 2020;731:144348.
- 937 42. Zhang D, Ning J, Okon I, Zheng X, Satyanarayana G, Song P, et al.  
938 Suppression of m6A mRNA modification by DNA hypermethylated ALKBH5  
939 aggravates the oncological behavior of KRAS mutation/LKB1 loss lung cancer. *Cell*  
940 *Death Dis*. 2021;12(6):518.
- 941 43. Zhang C, Samanta D, Lu H, Bullen JW, Zhang H, Chen I, et al. Hypoxia  
942 induces the breast cancer stem cell phenotype by HIF-dependent and  
943 ALKBH5-mediated m(6)A-demethylation of NANOG mRNA. *Proc Natl Acad Sci U S*  
944 *A*. 2016;113(14):E2047-56.
- 945 44. Chao Y, Shang J, Ji W. ALKBH5-m(6)A-FOXM1 signaling axis promotes  
946 proliferation and invasion of lung adenocarcinoma cells under intermittent hypoxia.  
947 *Biochem Biophys Res Commun*. 2020;521(2):499-506.

- 948 45. Inoue Y, Matsuura S, Kurabe N, Kahyo T, Mori H, Kawase A, et al.  
949 Clinicopathological and Survival Analysis of Japanese Patients with Resected  
950 Non-Small-Cell Lung Cancer Harboring NKX2-1, SETDB1, MET, HER2, SOX2,  
951 FGFR1, or PIK3CA Gene Amplification. *Journal of Thoracic Oncology*.  
952 2015;10(11):1590-600.
- 953 46. Du C, Kurabe N, Matsushima Y, Suzuki M, Kahyo T, Ohnishi I, et al. Robust  
954 quantitative assessments of cytosine modifications and changes in the expressions of  
955 related enzymes in gastric cancer. *Gastric Cancer*. 2015;18(3):516-25.
- 956 47. Zhou Y, Zeng P, Li YH, Zhang Z, Cui Q. SRAMP: prediction of mammalian  
957 N6-methyladenosine (m6A) sites based on sequence-derived features. *Nucleic Acids*  
958 *Res*. 2016;44(10):e91.
- 959 48. Zhou Z, Lv J, Yu H, Han J, Yang X, Feng D, et al. Mechanism of RNA  
960 modification N6-methyladenosine in human cancer. *Mol Cancer*. 2020;19(1):104.
- 961 49. National Center for Biotechnology Information, Gene, E2F1.  
962 <https://www.ncbi.nlm.nih.gov/gene/1869>.
- 963 50. National Center for Biotechnology Information, Gene, CDKN1A.  
964 <https://www.ncbi.nlm.nih.gov/gene/1026>.

- 965 51. National Center for Biotechnology Information, Gene, CCNG2.  
966 <https://www.ncbi.nlm.nih.gov/gene/901>.
- 967 52. National Center for Biotechnology Information, Gene, CASP14.  
968 <https://www.ncbi.nlm.nih.gov/gene/23581>.
- 969 53. National Center for Biotechnology Information, Gene, PMAIP1.  
970 <https://www.ncbi.nlm.nih.gov/gene/5366>.
- 971 54. National Center for Biotechnology Information, Gene, AKAP12.  
972 <https://www.ncbi.nlm.nih.gov/gene/9590>.
- 973 55. Carrier F, Smith ML, Bae I, Kilpatrick KE, Lansing TJ, Chen CY, et al.  
974 Characterization of human Gadd45, a p53-regulated protein. *J Biol Chem.*  
975 1994;269(51):32672-7.
- 976 56. Xue X, Fei X, Hou W, Zhang Y, Liu L, Hu R. miR-342-3p suppresses cell  
977 proliferation and migration by targeting AGR2 in non-small cell lung cancer. *Cancer*  
978 *Lett.* 2018;412:170-8.
- 979 57. Gan R, Yang Y, Yang X, Zhao L, Lu J, Meng QH. Downregulation of  
980 miR-221/222 enhances sensitivity of breast cancer cells to tamoxifen through  
981 upregulation of TIMP3. *Cancer Gene Ther.* 2014;21(7):290-6.

- 982 58. Wang JL, Chen ZF, Chen HM, Wang MY, Kong X, Wang YC, et al. Elf3 drives  
983 beta-catenin transactivation and associates with poor prognosis in colorectal cancer. *Cell*  
984 *Death Dis.* 2014;5:e1263.
- 985 59. Tsuchiya K, Yoshimura K, Inoue Y, Iwashita Y, Yamada H, Kawase A, et al.  
986 YTHDF1 and YTHDF2 are associated with better patient survival and an inflamed  
987 tumor-immune microenvironment in non-small-cell lung cancer. *Oncoimmunology.*  
988 2021;10(1):1962656.
- 989 60. Abbas T, Dutta A. p21 in cancer: intricate networks and multiple activities. *Nat*  
990 *Rev Cancer.* 2009;9(6):400-14.
- 991 61. Su CW, Lin CW, Yang WE, Yang SF. TIMP-3 as a therapeutic target for cancer.  
992 *Ther Adv Med Oncol.* 2019;11:1758835919864247.
- 993 62. Lei Y, Liu Z, Yang W. Negative correlation of cytoplasm TIMP3 with miR-222  
994 indicates a good prognosis for NSCLC. *Onco Targets Ther.* 2018;11:5551-7.
- 995 63. Garofalo M, Di Leva G, Romano G, Nuovo G, Suh SS, Ngankea A, et al.  
996 miR-221&222 regulate TRAIL resistance and enhance tumorigenicity through PTEN  
997 and TIMP3 downregulation. *Cancer Cell.* 2009;16(6):498-509.
- 998 64. Huang X, Zhang H, Guo X, Zhu Z, Cai H, Kong X. Insulin-like growth factor  
999 2 mRNA-binding protein 1 (IGF2BP1) in cancer. *J Hematol Oncol.* 2018;11(1):88.



- 1000 65. Kato T, Hayama S, Yamabuki T, Ishikawa N, Miyamoto M, Ito T, et al.  
1001 Increased expression of insulin-like growth factor-II messenger RNA-binding protein 1  
1002 is associated with tumor progression in patients with lung cancer. *Clin Cancer Res.*  
1003 2007;13(2 Pt 1):434-42.
- 1004 66. Huang RS, Zheng YL, Li C, Ding C, Xu C, Zhao J. MicroRNA-485-5p  
1005 suppresses growth and metastasis in non-small cell lung cancer cells by targeting  
1006 IGF2BP2. *Life Sci.* 2018;199:104-11.
- 1007 67. Findeis-Hosey JJ, Yang Q, Spaulding BO, Wang HL, Xu H. IMP3 expression is  
1008 correlated with histologic grade of lung adenocarcinoma. *Hum Pathol.*  
1009 2010;41(4):477-84.
- 1010 68. Findeis-Hosey JJ, Xu H. Insulin-like growth factor II-messenger RNA-binding  
1011 protein-3 and lung cancer. *Biotech Histochem.* 2012;87(1):24-9.
- 1012 69. Zhao W, Lu D, Liu L, Cai J, Zhou Y, Yang Y, et al. Insulin-like growth factor 2  
1013 mRNA binding protein 3 (IGF2BP3) promotes lung tumorigenesis via attenuating p53  
1014 stability. *Oncotarget.* 2017;8(55):93672-87.
- 1015 70. Cui Q, Shi H, Ye P, Li L, Qu Q, Sun G, et al. m(6)A RNA Methylation  
1016 Regulates the Self-Renewal and Tumorigenesis of Glioblastoma Stem Cells. *Cell Rep.*  
1017 2017;18(11):2622-34.

1018 71. Huang Y, Su R, Sheng Y, Dong L, Dong Z, Xu H, et al. Small-Molecule  
1019 Targeting of Oncogenic FTO Demethylase in Acute Myeloid Leukemia. *Cancer Cell*.  
1020 2019;35(4):677-91 e10.

1021 72. Li N, Kang Y, Wang L, Huff S, Tang R, Hui H, et al. ALKBH5 regulates  
1022 anti-PD-1 therapy response by modulating lactate and suppressive immune cell  
1023 accumulation in tumor microenvironment. *Proc Natl Acad Sci U S A*.  
1024 2020;117(33):20159-70.

1025

#### 1026 **Declarations**

#### 1027 **Acknowledgments**

1028 We are grateful to the patients and sample donors for their dedicated participation in this  
1029 study. We also thank Takaharu Kamo, Shiho Omori, Hisaki Igarashi (Tumor Pathology,  
1030 Hamamatsu University School of Medicine), Ryo Horiguchi, Masako Suzuki, and  
1031 Takuya Kitamoto (Advanced Research Facilities and Services, Hamamatsu  
1032 University School of Medicine) for providing technical assistance.

1033

#### 1034 **Author contributions**

1035 HS conceived this project, supervised all experiments and interpretations, and drafted  
1036 the manuscript. KT designed and performed all experiments, analyzed the data,  
1037 interpreted patient and experimental data, and drafted the manuscript. KY designed this  
1038 project, performed sample collection, histological examination, and a part of the  
1039 experiments, and drafted the manuscript. Yusuke Inoue performed sample collection and  
1040 histological examination. Yuji Iwashita designed this project, interpreted the  
1041 experimental data, and drafted the manuscript. TO performed molecular experiments,  
1042 interpreted the experimental data, and drafted the manuscript. HY and HW assisted part  
1043 of the experiments. AK, MT, HO, and KF performed sample collection. KS performed  
1044 sample collection and analyzed data. TS supervised this project. All authors have read  
1045 and approved the final manuscript.

1046

#### 1047 **Funding**

1048 This work was supported by grants from the Japan Society for the Promotion of Science  
1049 (JP22659072, JP24659161, JP26670187, JP16K15256) and HUSM Grant-in-Aid, and  
1050 Smoking Research Foundation.

1051

#### 1052 **Availability of data and materials**

1053 All data and supplementary information within the article are available from the  
1054 published article (including supplementary information files) or available on published  
1055 databases (TCGA or GEO). GEO accession numbers of our microarray data are  
1056 GSE165453 and GSE165453.

1057

1058 **Ethics approval and consent to participate**

1059 This study was approved by the Ethics Committees of Hamamatsu University School of  
1060 Medicine (20-011) and Seirei Mikatahara General Hospital and was carried out in  
1061 accordance with approved guidelines. Written informed consent was obtained from all  
1062 patients. All analyses were conducted in compliance with the ethical standards  
1063 according to the Helsinki Declaration.

1064

1065 **Consent for publication**

1066 Not applicable.

1067

1068 **Competing interests**

1069 The authors declare no competing interests.

1070

1071

1072

1073 **Figure legends**

1074 **Figure 1. High ALKBH5 expression was associated with a worse prognosis in**

1075 **patients with non-small-cell lung cancer.**

1076 (A) ALKBH5 and FTO mRNA levels were analyzed in the paired non-cancerous and

1077 NSCLC tissues using the TCGA database (n = 109 for each group). (B) ALKBH5 and

1078 FTO protein levels were assessed in the paired non-cancerous lung alveolar tissue and

1079 NSCLC tissues in the HUSM cohort via immunohistochemistry (IHC) using the

1080 H-score (n = 77 for each group). (C) Relative ALKBH5 and FTO mRNA expression

1081 levels were detected using qPCR in cell lines. Data were normalized to GAPDH and

1082 adjusted to the expression of BEAS2B cells (ALKBH5: n = 2, FTO: n = 3). (D)

1083 ALKBH5 and FTO protein expression levels were determined using western blot

1084 analysis in cell lines. (E) IHC staining for ALKBH5 and FTO were assessed using the

1085 TMA core of NSCLC tissues in the HUSM cohort. Staining intensity was categorized

1086 into 0 (absent), 1 (weak), 2 (moderate), or 3 (strong). (F) Immunofluorescence

1087 visualized subcellular localization in PC9 cells (×100). PC9 cells infected with

1088 pRetroX-TetOne puro- ALKBH5 were transduced by 100 ng/mL of doxycycline and

1089 used as ALKBH5 overexpression. PC9 cells without doxycycline were used as a  
1090 negative control. **(G)** A Kaplan–Meier survival curve with a log-rank test was utilized to  
1091 analyze the overall survival of the HUSM cohort. Patients were stratified into low (blue)  
1092 or high-expression groups (red) based on a cutoff determined by the median H-scores (n  
1093 = 627). Results were presented as the median (A and B) or mean  $\pm$  SD (c). \*\*\*\* $P <$   
1094 0.0001 indicates a significant difference between the indicated groups.

1095

1096 **Figure 2. ALKBH5 knockdown suppressed cell proliferation in non-small-cell lung**  
1097 **cancer**

1098 **(A, B)** Western blot analysis demonstrated ALKBH5 protein levels in cells transfected  
1099 with siRNA for ALKBH5 (siALKBH5), FTO (siFTO), control (siNC), or nontreated  
1100 cells (NT). **(C)** Cell proliferation relative to baseline in PC9 and A549 cells transfected  
1101 with siALKBH5 (#1 and #3) or siNC were assessed using the CCK-8 assay (n = 3). **(D)**  
1102 Cell proliferation relative to baseline in PC9 and A549 cells transfected with siFTO (#1  
1103 and #3) or siNC were assessed using the CCK-8 assay (n = 3). **(E)** The migration ability  
1104 of PC9 and A549 cells transfected with siALKBH5 (#1 and #3) or siNC were assessed  
1105 using transwell migration assay. The bar charts indicate the number of migratory cells  
1106 that passed through the chamber membrane (n = 3). **(F, G)** The migration ability of PC9

1107 (F) and A549 (G) cells transfected with siALKBH5 (#1 and #3) or siNC was assessed  
1108 using wound-healing assay (n = 3). Results were presented as mean  $\pm$  SD. \*\* $P < 0.01$ ,  
1109 \*\*\* $P < 0.001$ , \*\*\*\* $P < 0.0001$  indicates a significant difference between the indicated  
1110 groups.

1111

1112 **Figure 3. ALKBH5 knockdown-induced G1 phase arrest of cell cycle and/or**  
1113 **apoptosis in non-small-cell lung cancer**

1114 (A–D) The cell cycle was examined via flow cytometry with PC9 (A) and A549 (C)  
1115 cells transfected with siALKBH5 (#1 and #3) or siNC. The bar charts indicate the  
1116 percentage of cells in each cell cycle phase [n = 6 for PC9 (B), n = 3 for A549 cells (D)].

1117 (E and F) Apoptotic cells were determined using flow cytometric analysis of PC9 cells  
1118 transfected with siALKBH5 (#1 and #3) or siNC. (E) Percentage of the apoptotic cells

1119 in which both propidium iodide and annexin V were positive are shown in a

1120 representative scatter plot. (F) The apoptosis rate in ALKBH5 knockdown was

1121 compared with siNC and shown as a bar chart (n = 3). (G and H) Cisplatin- or

1122 gefitinib-induced apoptotic cells were determined via flow cytometry with PC9 cells

1123 transfected with siALKBH5 or siNC. (G) Percentage of apoptotic cells shown in a

1124 representative scatter plot. (H) The cisplatin- or gefitinib-induced apoptosis rate in

1125 ALKBH5 knockdown was compared with siNC and shown as a bar chart (n = 3). **(I and**  
1126 **J)** Apoptotic cells were determined via flow cytometry with A549 cells transfected with  
1127 siALKBH5 or siNC. **(I)** Percentage of the apoptotic cells shown in a representative  
1128 scatter plot. **(J)** Apoptosis rate in ALKBH5 knockdown was compared with siNC and  
1129 shown as a bar chart (n = 6). **(K and L)** Cisplatin-induced apoptotic cells were  
1130 determined via flow cytometric analysis of A549 cells transfected with siALKBH5 or  
1131 siNC. **(K)** Percentage of the apoptotic cells shown in a representative scatter plot. **(L)**  
1132 The cisplatin-induced apoptosis rate in ALKBH5 knockdown was compared with siNC  
1133 and shown as a bar chart (n = 3). Results were presented as mean  $\pm$  SD. \* $P < 0.05$ , \*\* $P$   
1134  $< 0.01$ , \*\*\* $P < 0.001$ , \*\*\*\* $P < 0.0001$  indicates a significant difference between the  
1135 indicated groups.

1136

#### 1137 **Figure 4. ALKBH5 overexpression promoted cell proliferation**

1138 Immortalized cells infected with pRetroX-TetOne puro empty vector (empty) or  
1139 pRetroX-TetOne puro-ALKBH5 (ALKBH5) were used to assess the function of  
1140 ALKBH5-overexpressed cells. The concentration of doxycycline (DOX) was 100  
1141 ng/mL. **(A)** Western blot analysis demonstrated ALKBH5 protein levels in  
1142 ALKBH5-overexpressed HEK293 and BEAS2B cells. **(B, C)** Cells infected with



1143 pRetroX-TetOne puro-ALKBH5 with DOX were designated as ALKBH5  
1144 overexpression (OE), whereas those without DOX were designated as negative control  
1145 (NC). Cell proliferation relative to baseline in ALKBH5 OE HEK293 and BEAS2B  
1146 cells were assessed using the CCK-8 assay (n = 3). **(D–G)** The migration ability of  
1147 HEK293 and BEAS2B cells was assessed via wound-healing assay. Representative  
1148 images of the wound-healing assay for HEK293 **(D)** and BEAS2B **(F)** cells. Wound  
1149 areas relative to baseline at each time point were compared between ALKBH5 OE and  
1150 NC HEK293 **(E)** and BEAS2B **(G)** cells (n = 3). Results are presented as mean ± SD.  
1151 \**P* < 0.05 indicates a significant difference between the indicated groups.

1152

1153 **Figure 5. ALKBH5 altered the abundance of m<sup>6</sup>A modification in polyA-enriched**  
1154 **RNA**

1155 **(A)** Representative chromatograms obtained using liquid chromatography–mass  
1156 spectrometry/mass spectrometry (LC–MS/MS) for adenosine (upper panel, 2.89 min),  
1157 *N*<sup>6</sup>-methyladenosine (middle panel, 3.81 min), and *N*<sup>6</sup>-methyladenosine-d3 (lower panel,  
1158 3.76 min) in polyA-enriched RNA extracted from PC9 cells. Peak areas were quantified  
1159 as the product of retention time (min) and count per seconds (cps). **(B and C)** The peak  
1160 areas of m<sup>6</sup>A were normalized to that of m<sup>6</sup>A-d3. The amount of m<sup>6</sup>A in PC9 **(B)** and

1161 A549 (C) cells transfected with siALKBH5 was compared with that in cells transfected  
1162 with siNC for 48, 72, and 96 h (n = 3). (D) PolyA-enriched RNAs were extracted from  
1163 PC9 cells containing pRetroX-TetOne puro-ALKBH5 vector. m<sup>6</sup>A/m<sup>6</sup>A-d3 in the cells  
1164 incubated with various concentrations of DOX for 48 h were compared with that in cells  
1165 incubated with 0 ng/mL DOX (n = 3). (E) m<sup>6</sup>A/m<sup>6</sup>A-d3 in PC9 cells containing  
1166 pRetroX-TetOne puro-ALKBH5 vector (ALKBH5 OE) whose ALKBH5  
1167 overexpression was induced by 100 ng/mL DOX for 24, 48, 72, 96, 120 h was  
1168 compared with those without DOX (NC) (n = 3). (F) m<sup>6</sup>A/m<sup>6</sup>A-d3 in HEK293 and  
1169 BEAS2B (ALKBH5 OE) cells whose ALKBH5 overexpression was induced by 100  
1170 ng/mL DOX for 48 h were compared with those without DOX (NC) (n = 3). Results  
1171 were presented as mean ± SD. \**P* < 0.05, \*\**P* < 0.01, \*\*\**P* < 0.001, \*\*\*\**P* < 0.0001  
1172 indicates a significant difference between the indicated groups by Student's *t*-test.

1173

1174 **Figure 6. ALKBH5 knockdown regulated cell proliferation-related genes and m<sup>6</sup>A**  
1175 **abundance in the 3' untranslated regions of specific genes**

1176 PC9 cells were transfected with siNC, siALKBH5#1, or siALKBH5#3 for 96 h (n = 3  
1177 for each group). (A, B) Differentially expressed genes (DEGs) for siALKBH5#1 (A) or  
1178 siALKBH5#3 (B) were detected using expression microarray and shown using volcano

1179 plots. Dashed lines indicate the threshold for the differential expression [fold change >  
1180 1.5 (log<sub>2</sub> fold change = 0.5849) or < 0.67 (log<sub>2</sub> fold change = -0.5849),  $P < 0.01$  via  
1181 Student's *t*-test] for upregulated (pink dots) or downregulated (light blue dots) genes.  
1182 (C) Venn diagram indicating the number of common DEGs in ALKBH5-knockdown  
1183 cells with different siRNA sequences. (D) mRNA expression levels of genes related to  
1184 cell proliferation in ALKBH5-knockdown PC9 cells were analyzed using qPCR. Gene  
1185 expression was normalized to the GAPDH expression and was shown relative to the  
1186 expression with siNC. (E) m<sup>6</sup>A level in the 3' UTRs of target mRNA in PC9 cells  
1187 transfected with siALKBH5#1 or siALKBH5#3 was quantified via MeRIP qPCR using  
1188 anti-m<sup>6</sup>A antibody and was compared with that in cell transfected with siNC. The m<sup>6</sup>A  
1189 level was normalized to that of the input fraction (n = 3). IgG was used to evaluate the  
1190 nonspecific binding of the target mRNA. (F; Upper panel) Prediction scores of m<sup>6</sup>A  
1191 modification in the CDKN1A and TIMP3 genes were calculated using the SRAMP  
1192 algorithm. The combined scores were distributed through the full-length mRNA as  
1193 different levels of very high, high, moderate, and low confidence. Arrows show the  
1194 location of qPCR primers. Adenosines in consensus sequences for m<sup>6</sup>A modification are  
1195 presented in red. (Lower panel) PolyA-enriched RNA extracted from PC9 cells  
1196 transfected with siALKBH5#1, siALKBH5#3, or siNC (n = 3) was immunoprecipitated

1197 using anti-m<sup>6</sup>A antibody or normal IgG. The m<sup>6</sup>A level was calculated from transcript  
1198 abundance in input or MeRIP fraction quantified using qPCR. Results are presented as  
1199 mean  $\pm$  SD. \**P* < 0.05, \*\**P* < 0.01, \*\*\**P* < 0.001, \*\*\*\**P* < 0.0001 indicates a  
1200 significant difference between the indicated groups.

1201

1202

1203 **Figure 7. CDKN1A and TIMP3 were targets of m<sup>6</sup>A modification via ALKBH5**

1204 (A) A schematic outline showing the workflow for the analysis of downstream targets of  
1205 ALKBH5. (B) Target protein levels in PC9 or A549 cells transfected with siALKBH5#1  
1206 or siALKBH5#3 were compared with those transfected with siNC via western blot  
1207 analysis. (C) Western blot analysis demonstrated CDKN1A (p21) or TIMP3 protein  
1208 levels in PC9 cells transfected with siALKBH5, siCDKN1A, both siALKBH5 and  
1209 siCDKN1A, or siNC. (D) Western blot analysis demonstrated TIMP3 protein levels in  
1210 A549 cells transfected with siALKBH5, siTIMP3, both siALKBH5 and siTIMP3, or  
1211 siNC. (E and F) Cell proliferation relative to baseline in PC9 (E) and A549 (F) cells  
1212 transfected with siALKBH5 was assessed via the CCK-8 assay and compared with that  
1213 in cells cotransfected with siALKBH5 and siCDKN1A or siTIMP3 (n = 3). \*\*\**P* <  
1214 0.001, \*\*\*\**P* < 0.0001 indicates a significant difference between the indicated groups.

1215

1216 **Figure 8. IGF2BPs was required for the ALKBH5-induced regulation of mRNA**

1217 **expression and cell proliferation**

1218 (A) Expression levels of IGF2BP1, IGF2BP2, and IGF2BP3 (IGF2BPs) protein

1219 determined using western blot analysis were compared between cell lines. (B) IGF2BP

1220 protein levels in cells transfected with siALKBH5 (left end), those in cells transfected

1221 with siIGF2BP1, siIGF2BP2, or siIGF2BP3 with or without siALKBH5 (middle two

1222 lanes), or those with siNC (right end indicating both siALKBH5 and siIGF2BPs were

1223 negative) were confirmed via western blot analysis. (C) Relative mRNA expression

1224 levels of CDKN1A in PC9 cells or those of TIMP3 in A549 cells transfected with

1225 siALKBH5 were analyzed via qPCR and compared with those in cells cotransfected

1226 with siALKBH5 and one of the siIGF2BPs. Gene expression was normalized to the

1227 GAPDH expression and was shown relative to the expression in siNC (n = 3). (D)

1228 Expression levels of YTHDF2 protein determined using western blot analysis were

1229 compared between cell lines. (E) Relative mRNA expression levels of CDKN1A in PC9

1230 cells or those of TIMP3 in A549 cells transfected with siALKBH5 were analyzed via

1231 qPCR and compared with those in cells cotransfected with siALKBH5 and siYTHDF2.

1232 Gene expression was normalized to the GAPDH expression and was shown relative to

1233 the expression in siNC (n = 3). **(F)** The remaining RNA level of CDKN1A in PC9 cells  
1234 or of TIMP3 in A549 cells after actinomycin D treatment for 0, 2, 4, and 6 h was  
1235 determined using qPCR and normalized to the expression at 0 h. RNA decay rate in  
1236 cells transfected with siALKBH5 and/or one of the siIGF2BPs and siNC were  
1237 compared with the stability of CDKN1A and TIMPs (n = 3). **(G)** Cell proliferation  
1238 relative to baseline in PC9 and A549 cells transfected with siALKBH5 was assessed via  
1239 the CCK-8 assay and compared with that in cells cotransfected with siALKBH5 and one  
1240 of the siIGF2BPs (n = 3). **(H)** Schematic illustration for the proposed mechanism of  
1241 tumorigenicity via ALKBH5 in non-small-cell lung cancer. Upregulation of ALKBH5  
1242 in NSCLC reduces m<sup>6</sup>A modifications on the 3' UTR of specific genes. The loss of m<sup>6</sup>A  
1243 decreases the opportunity for recognition by IGF2BPs and destabilizes the target  
1244 transcripts such as CDKN1A (p21) and TIMP3. Downregulation of CDKN1A (p21) and  
1245 TIMP3 induces cell cycle alteration and inhibits apoptosis. This ALKBH5–IGF2BPs  
1246 axis promotes cell proliferation and tumorigenicity, which, in turn, causes the  
1247 unfavorable prognosis of NSCLC. Results are presented as mean ± SD. \**P* < 0.05, \*\**P*  
1248 < 0.01, \*\*\**P* < 0.001, \*\*\*\**P* < 0.0001 indicates a significant difference between the  
1249 indicated groups.  
1250

1251

Figure 1

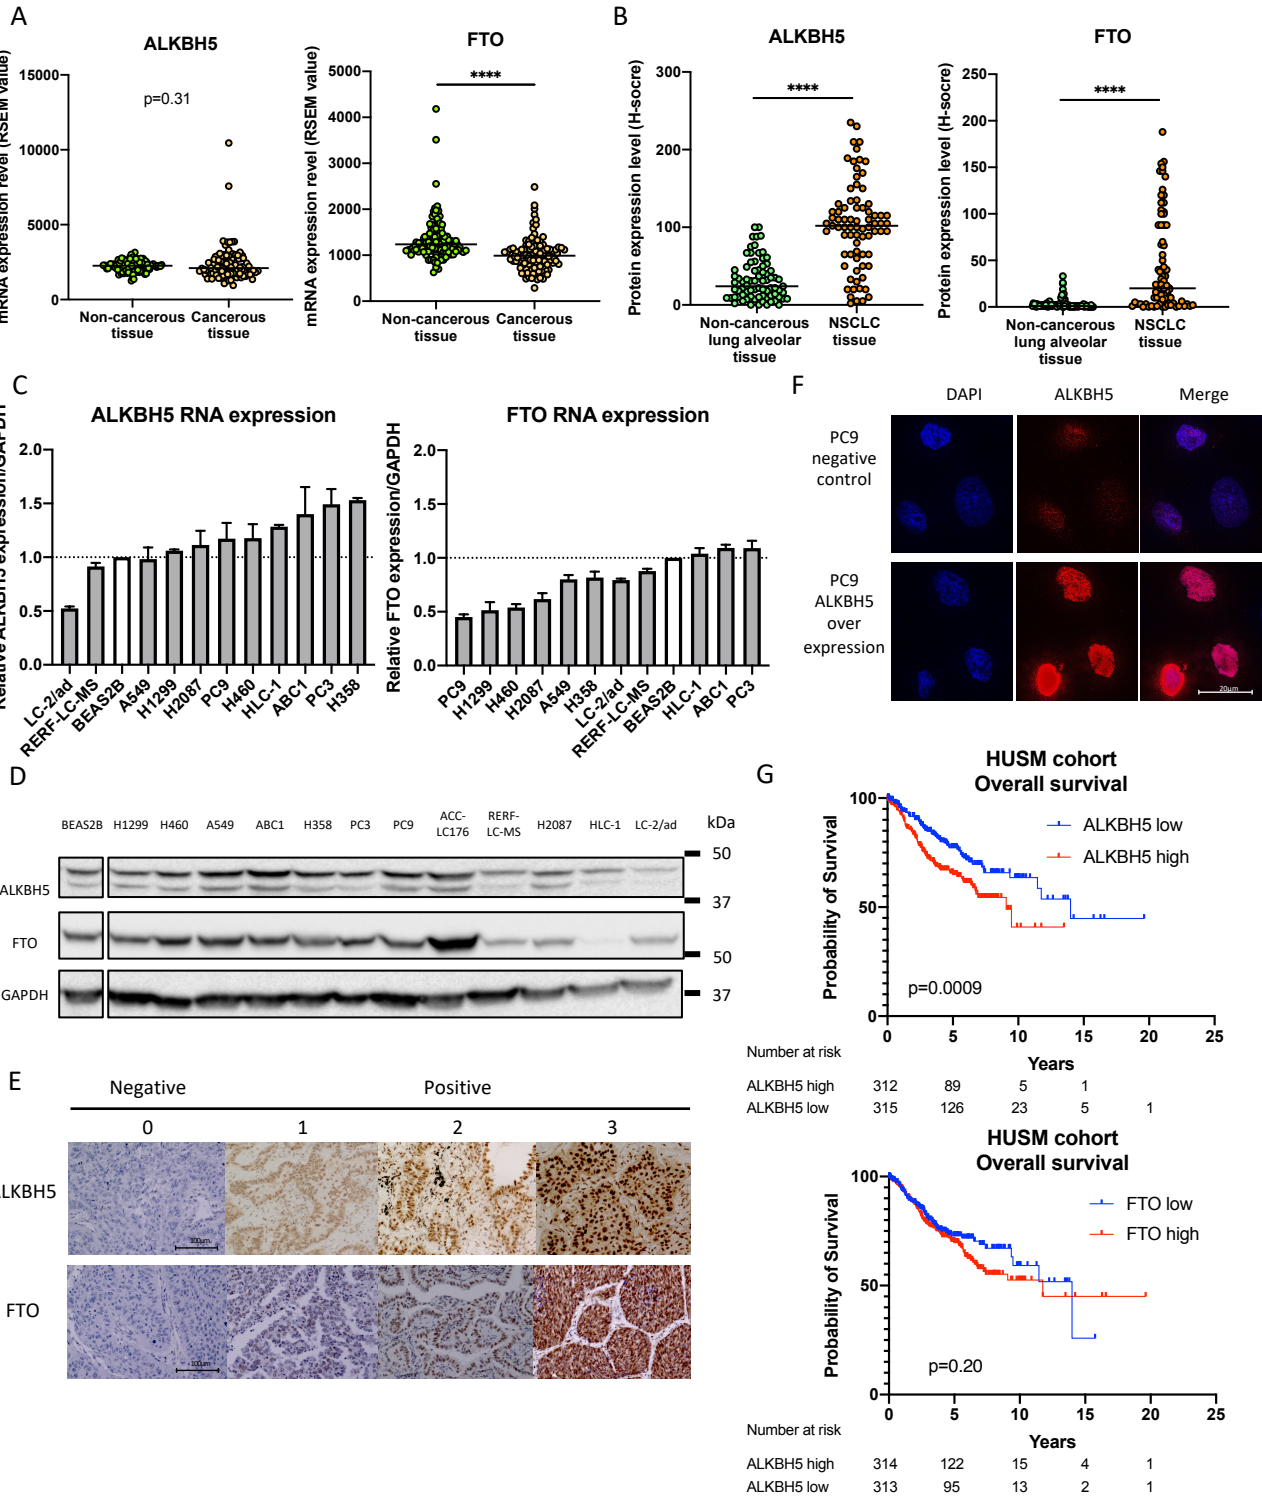



Figure 2

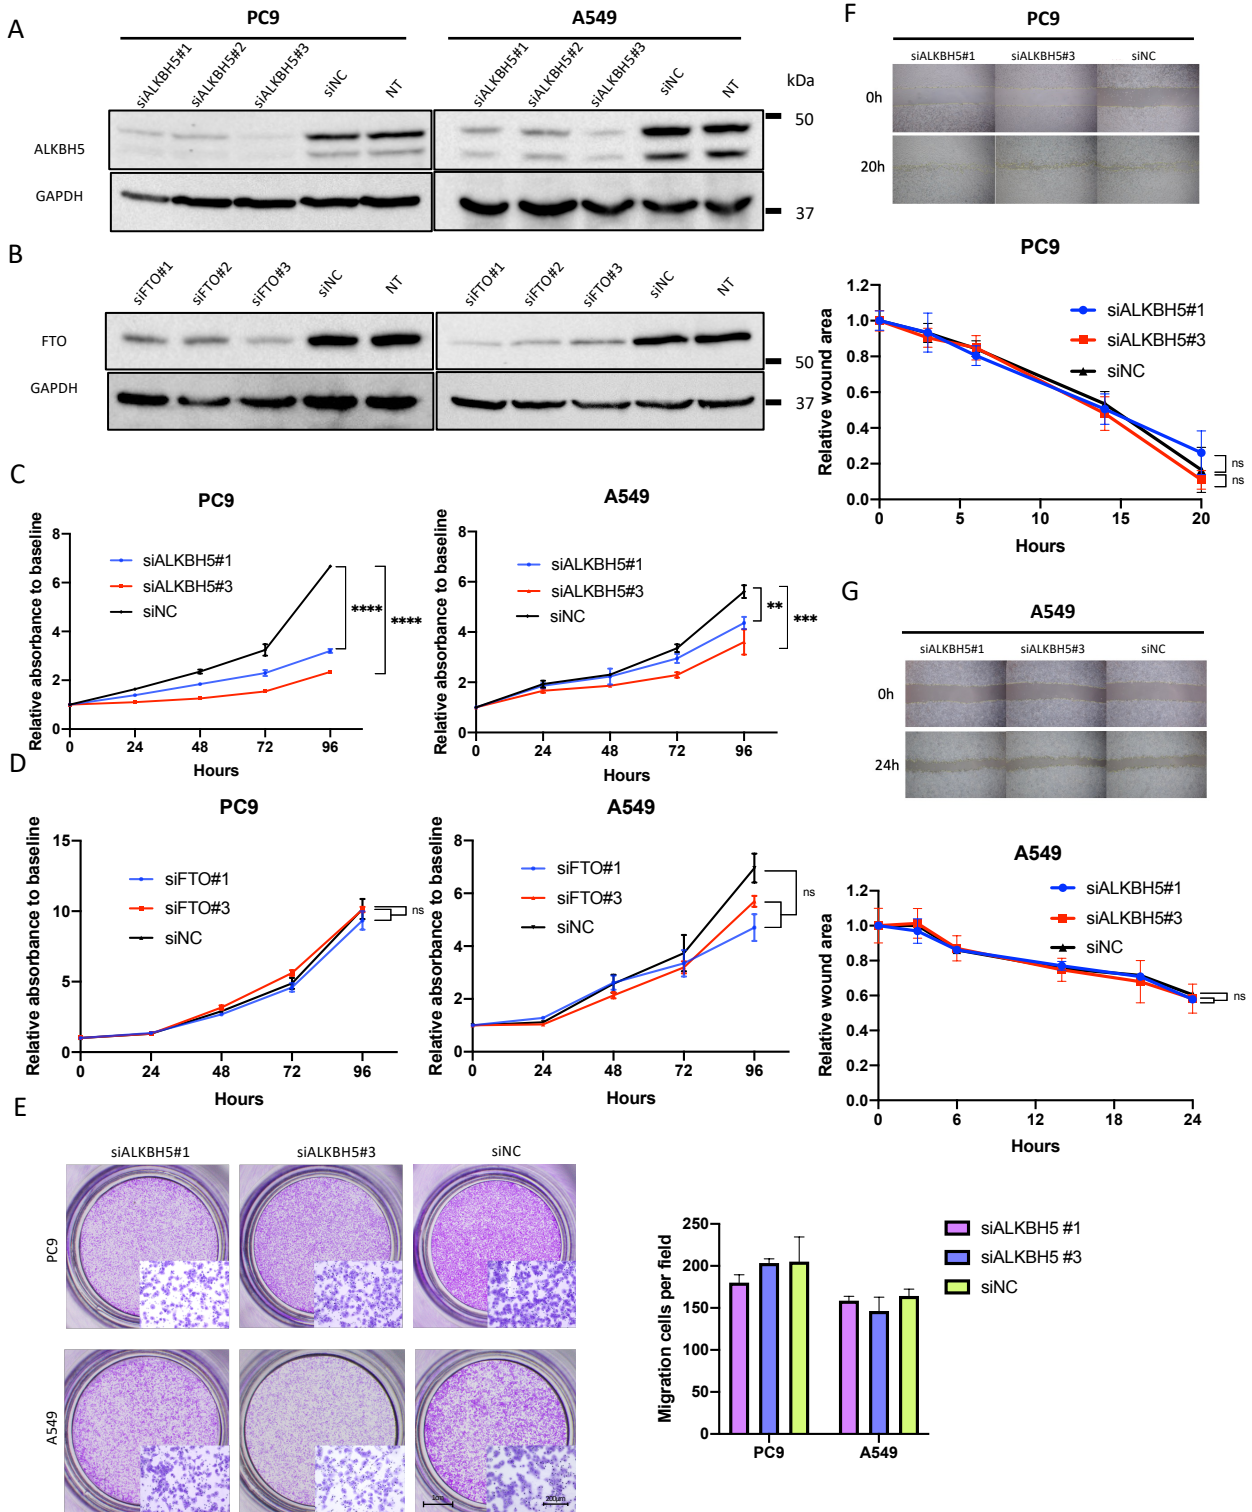

Figure 3

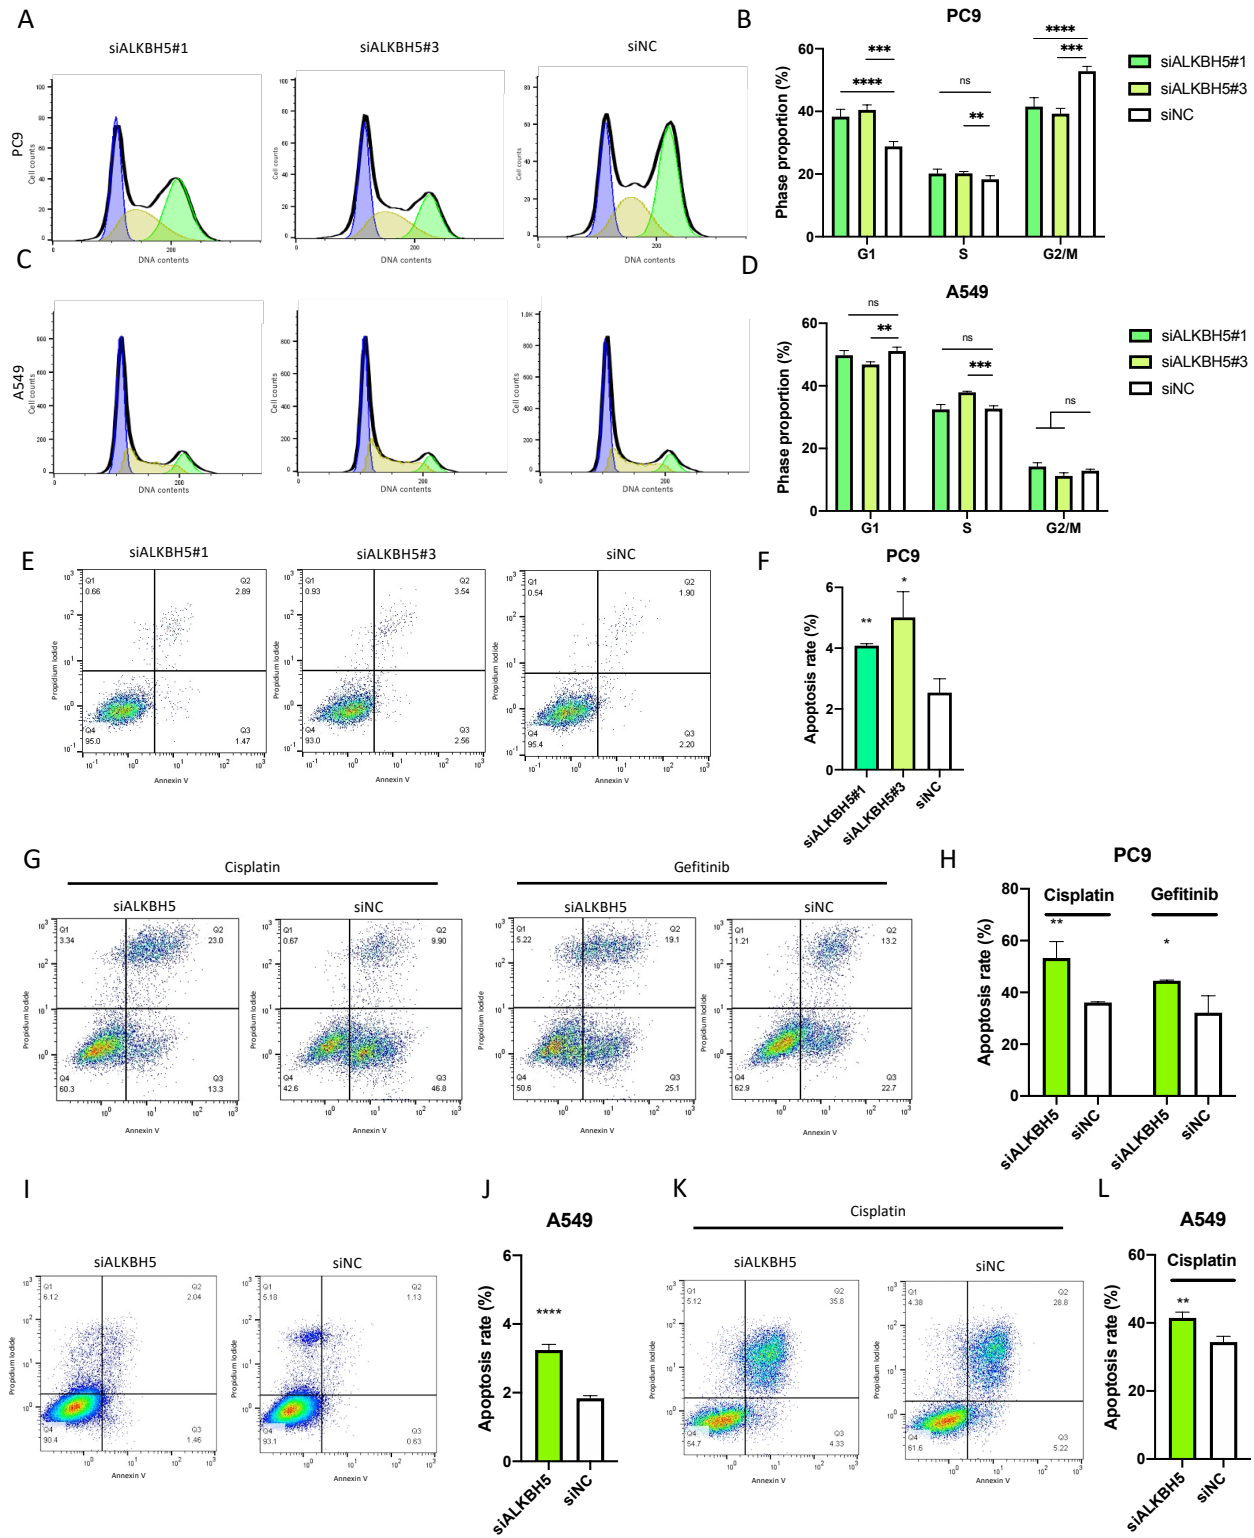

Figure 4

A

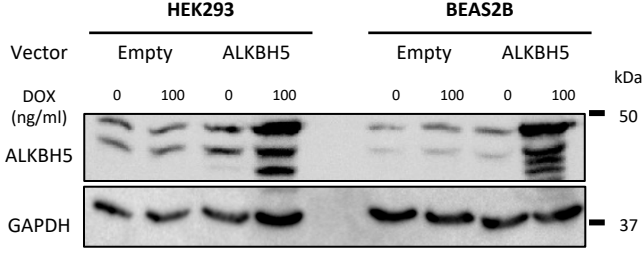

B

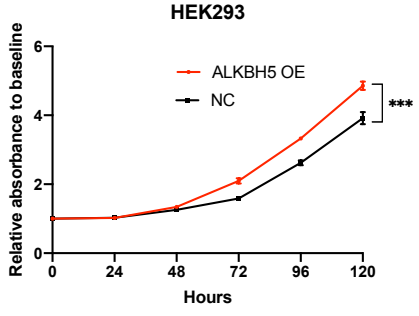

C

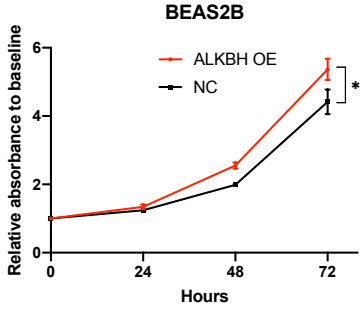

D

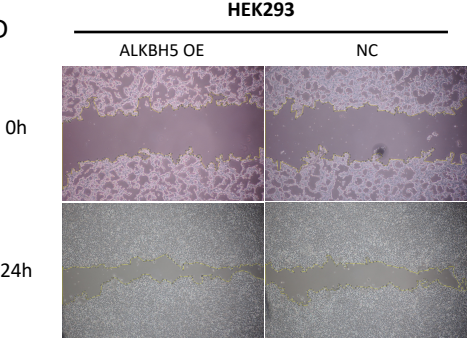

F

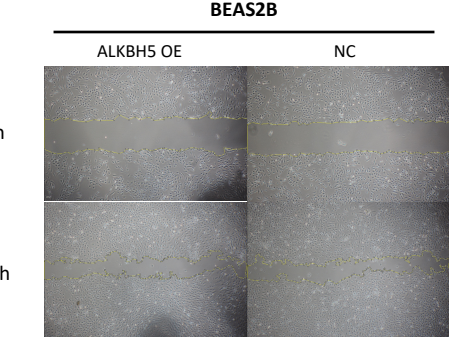

E

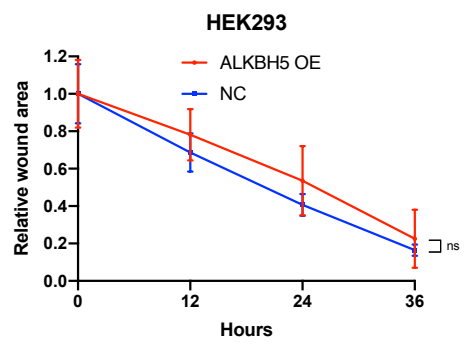

G

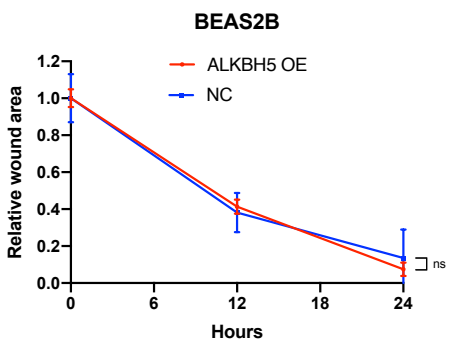

Figure 5

A

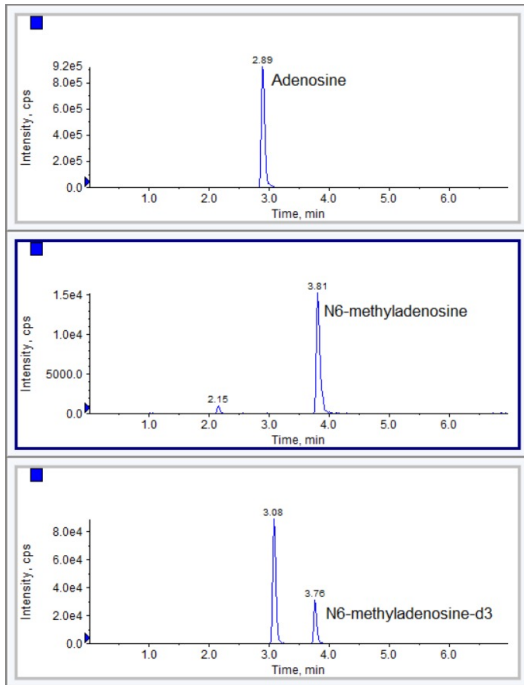

B

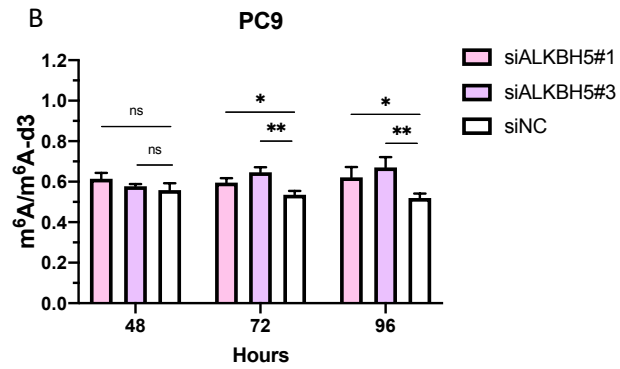

C

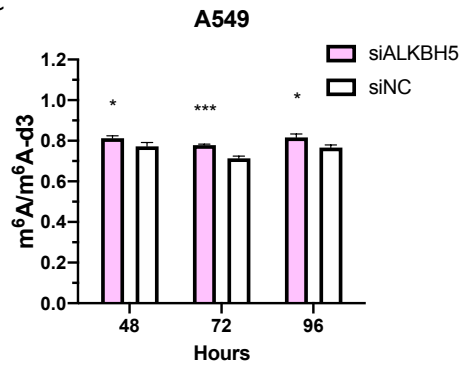

D

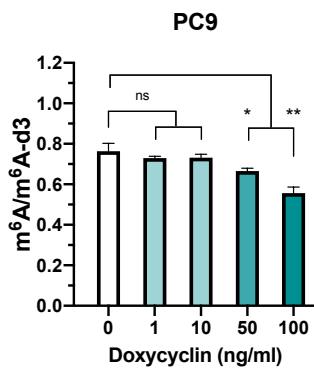

E

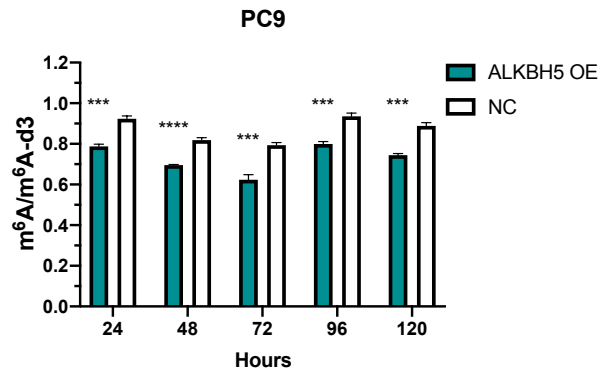

F

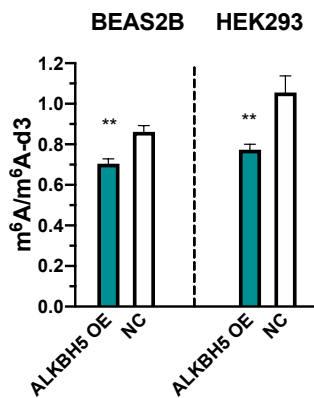

Figure 6

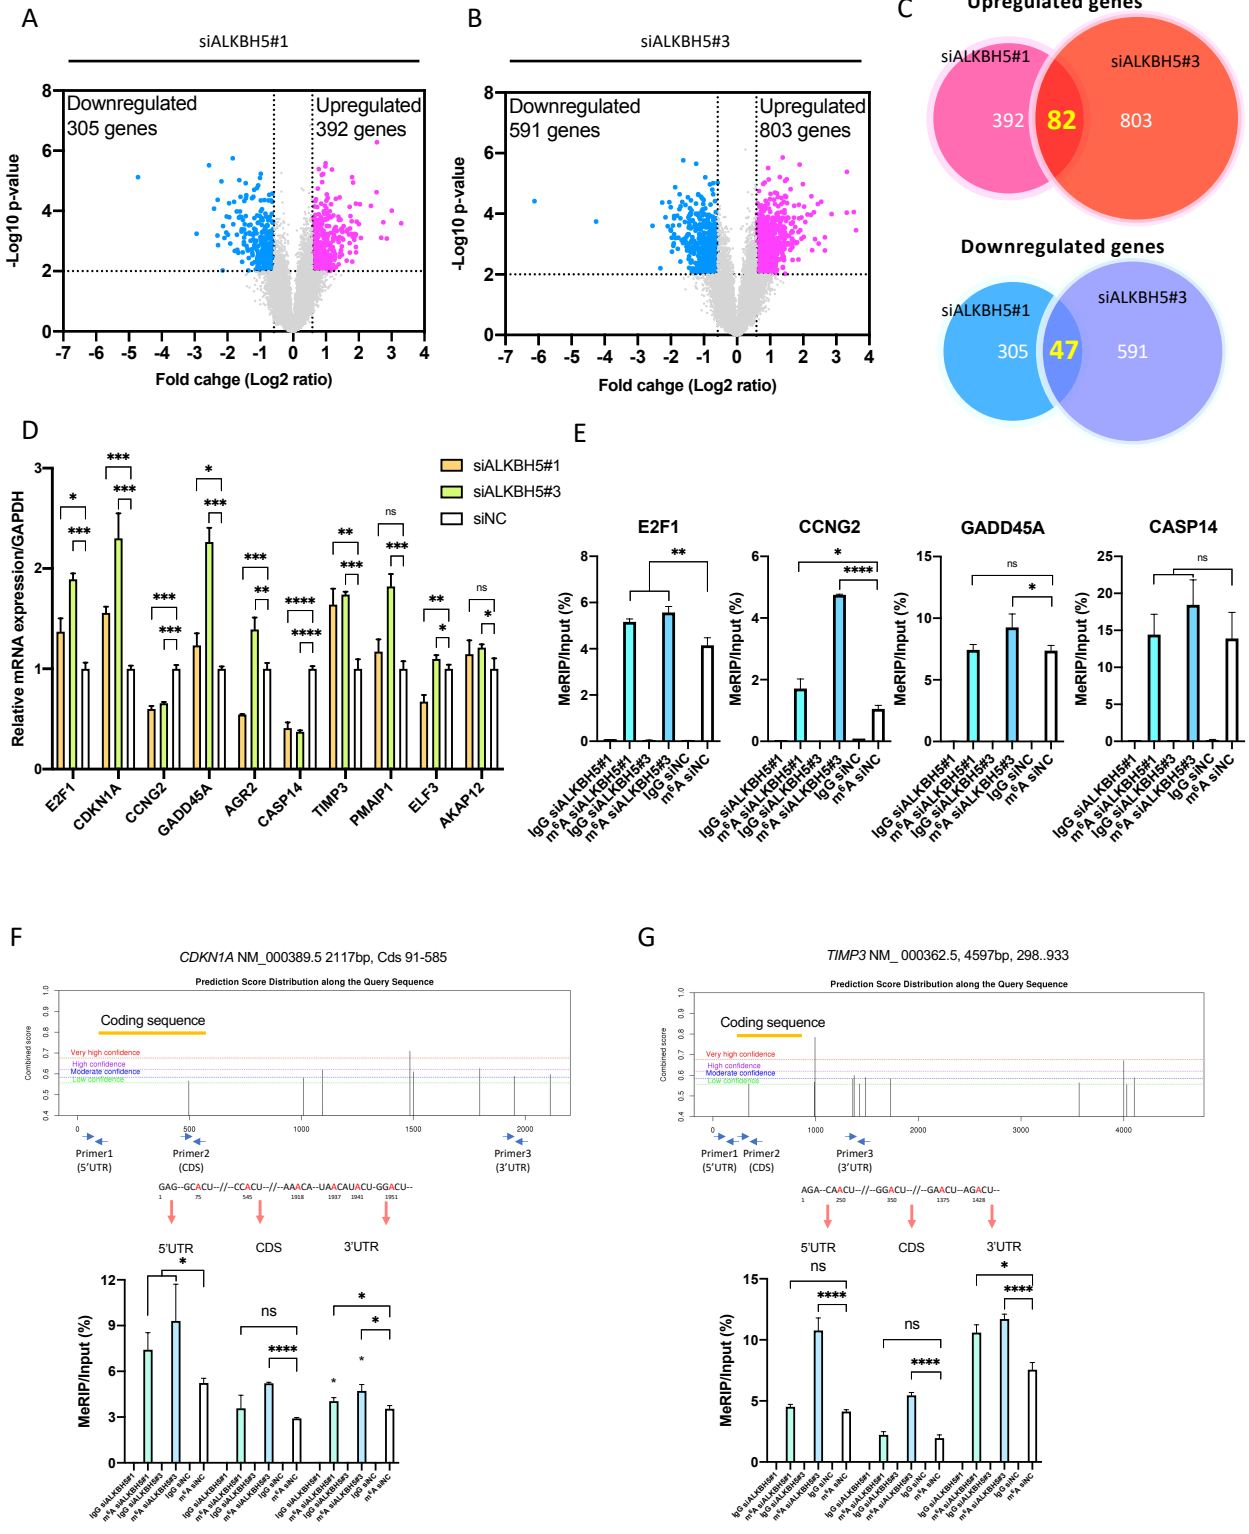

Figure 7

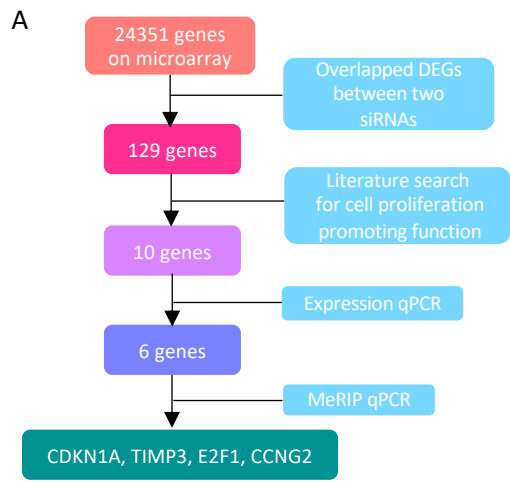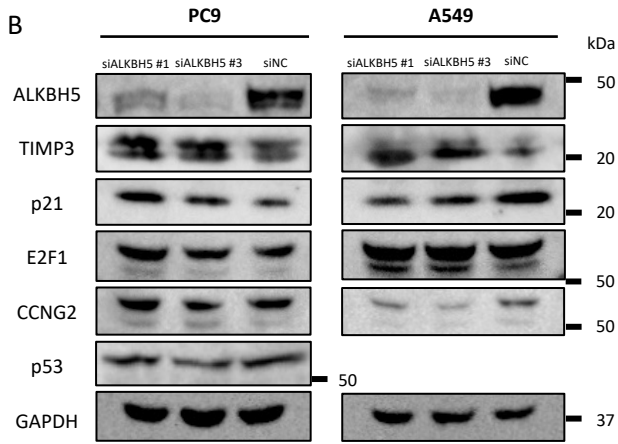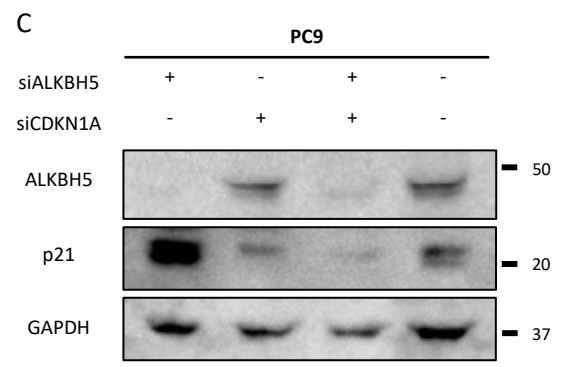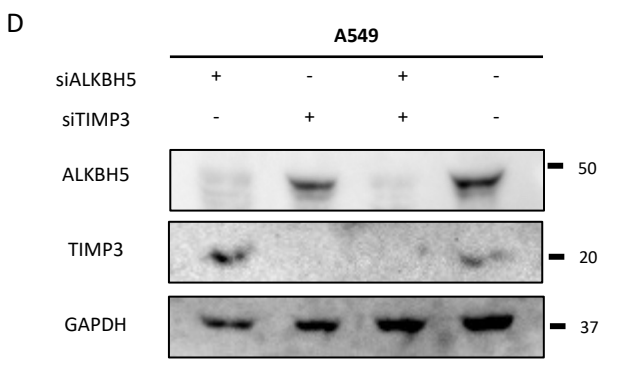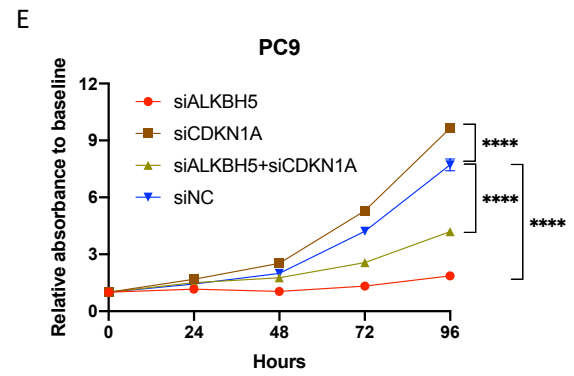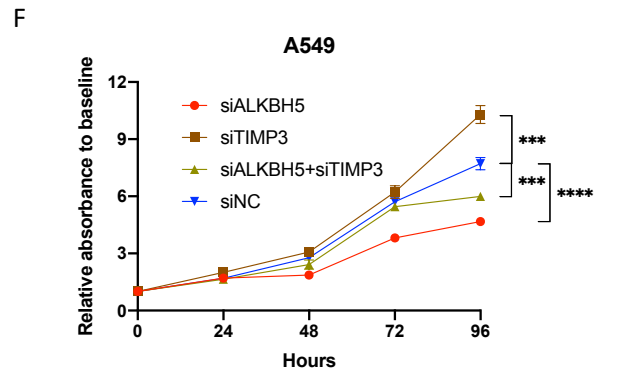

Figure 8

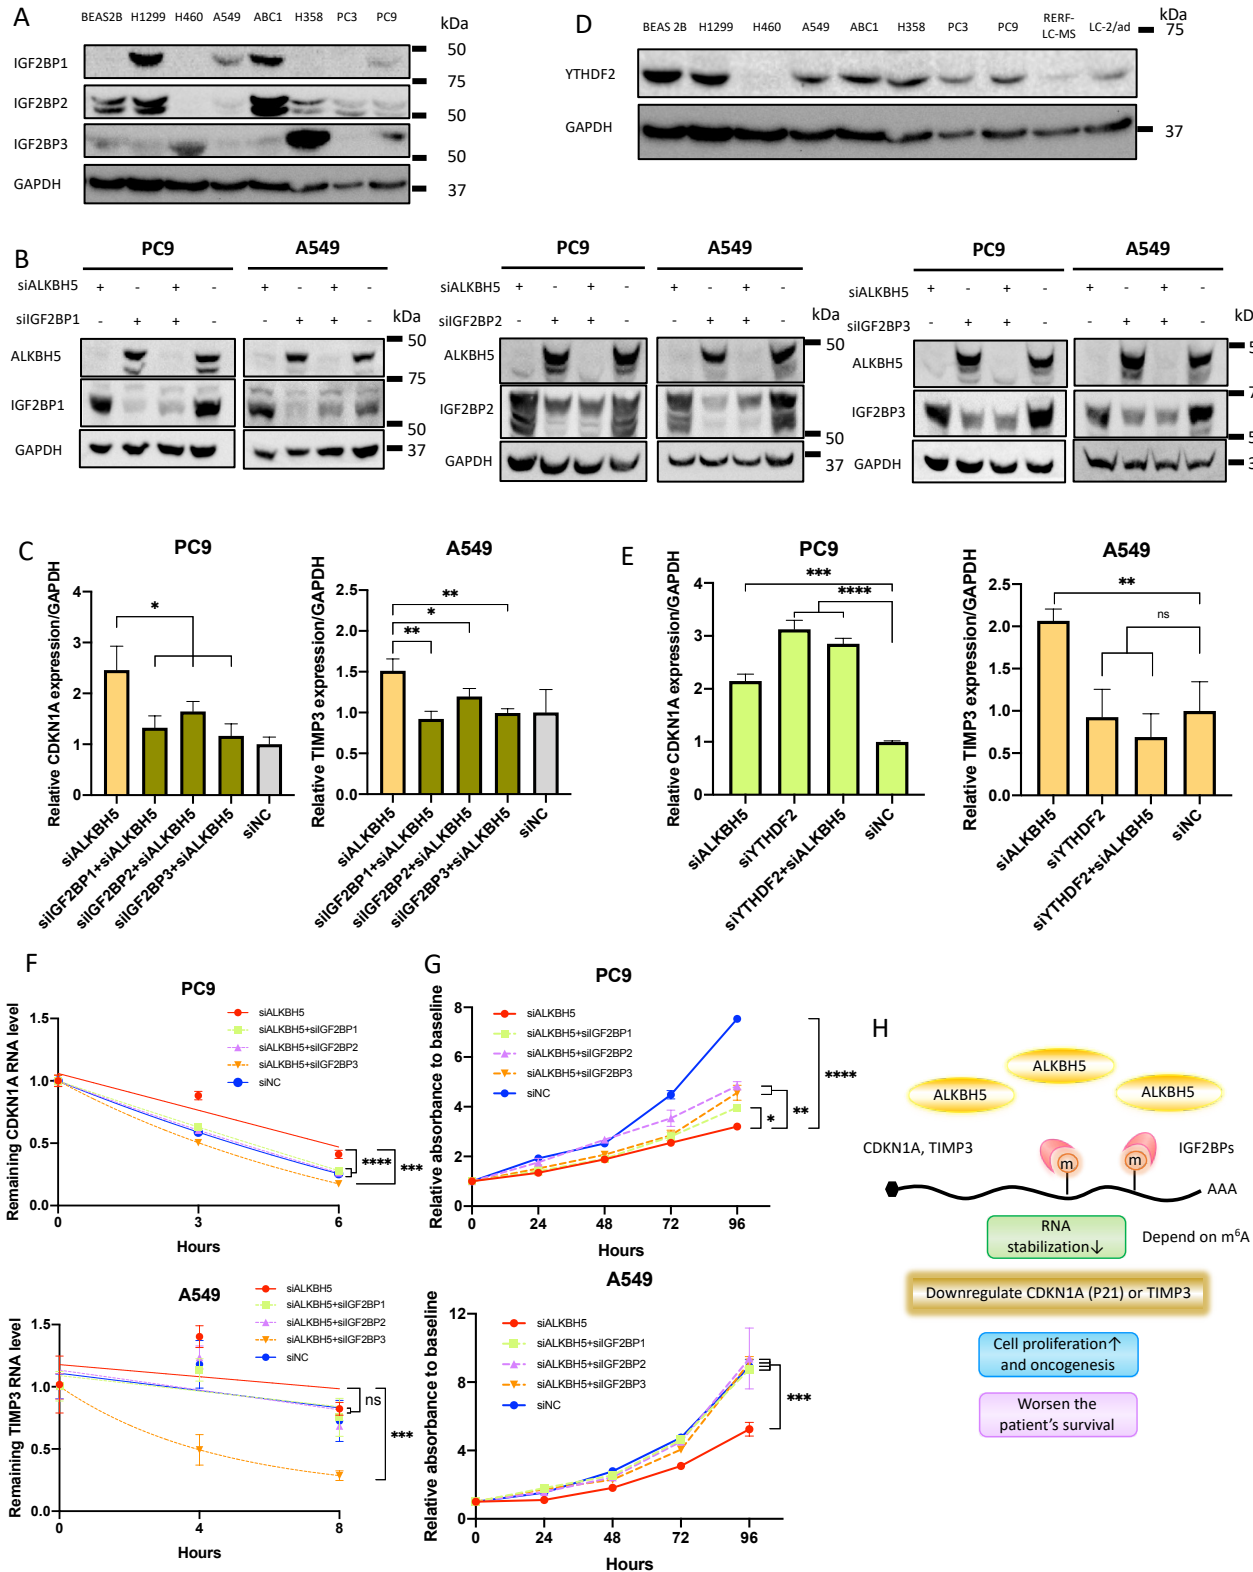

Source: https://www.biorxiv.org/content/10.1101/2021.07.06.451216v2.full.pdf
